# Supplementary material for: Cbx4 maintains the epithelial lineage identity and cell proliferation in the developing stratified epithelium
Source: PubMed Central journal article supplement — J Cell Biol. 2016 Jan 4;212(1):77–89. doi: 10.1083/jcb.201506065 (PMC4700479; doi:10.1083/jcb.201506065), 2016-01-04
Supplement: JCB_201506065_sm.pdf [file JCB_201506065_sm.pdf]

Mardaryev et al., <http://www.jcb.org/cgi/content/full/jcb.201506065/DC1>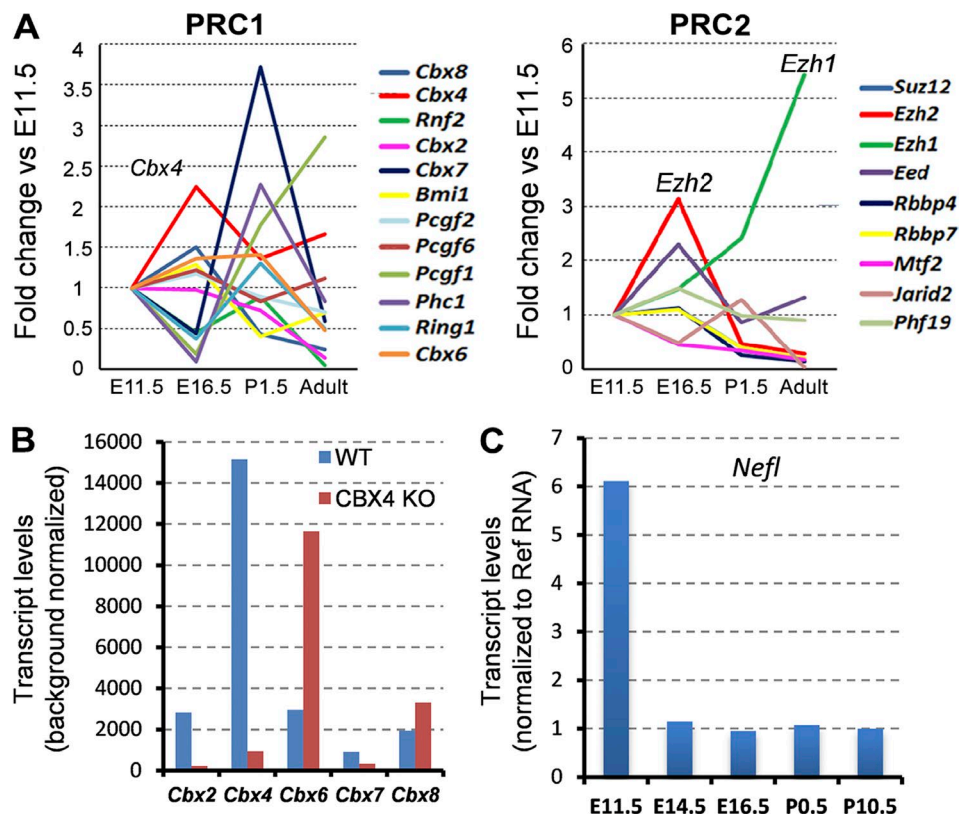

Figure S1. **Expression of the PRC1/PRC2 genes and *Nefl* gene in mouse epidermis during development.** (A) Expression of the distinct PRC1 and PRC2 genes in the laser-captured mouse epidermis during distinct stages of development (Agilent microarray values normalized to the reference RNA levels are shown relative to the corresponding expression levels in E11.5 epidermis). The data shown are from a single experiment performed in duplicate. (B) Expression of different *Cbx* genes in the epidermis of E16.5 WT and *Cbx4*KO mice (Agilent microarray, background-normalized data). The data shown are from a single experiment performed in duplicate (mean  $\pm$  SD).  $n = 2$ ; two-way *t* test. (C) Expression of the *Nefl* transcripts in WT mouse epidermis at distinct stages of development (Agilent microarray values normalized to the reference RNA levels). The data shown are from a single experiment performed in duplicate (mean  $\pm$  SD;  $n = 2$ ; one-way ANOVA).

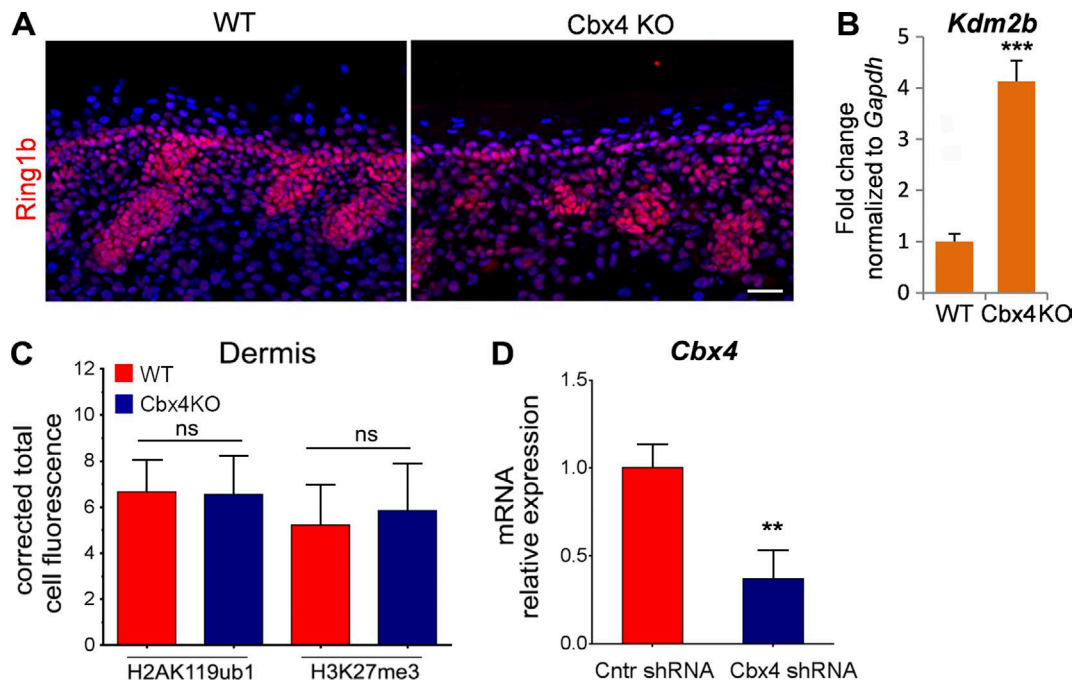

Figure S2. **Characterization of the changes in gene expression in the epidermis of *Cbx4*KO mice and in primary KCs after *Cbx4* knockdown.** (A) Immunofluorescence detection of Ring1b shows similar patterns of expression in the epidermis of E16.5 WT and *Cbx4*KO mice. Bar, 25  $\mu$ m. (B) *Kdm2b* transcript levels are significantly up-regulated in the E16.5 epidermis of *Cbx4*KO mice compared with WT controls (mean  $\pm$  SD;  $n = 3$ ). (C) Correlated total cell fluorescence level of H2AK119ub1 and H3K27me3 show a lack of differences in their expression between the dermal cells of E16.5 WT and *Cbx4*KO mice. (D) Down-regulation of the *Cbx4* transcripts in the primary mouse KCs after treatment with *Cbx4* shRNA (mean  $\pm$  SD;  $n = 3$ ). \*\*,  $P < 0.01$ ; \*\*\*,  $P < 0.001$ . ns, not significant.

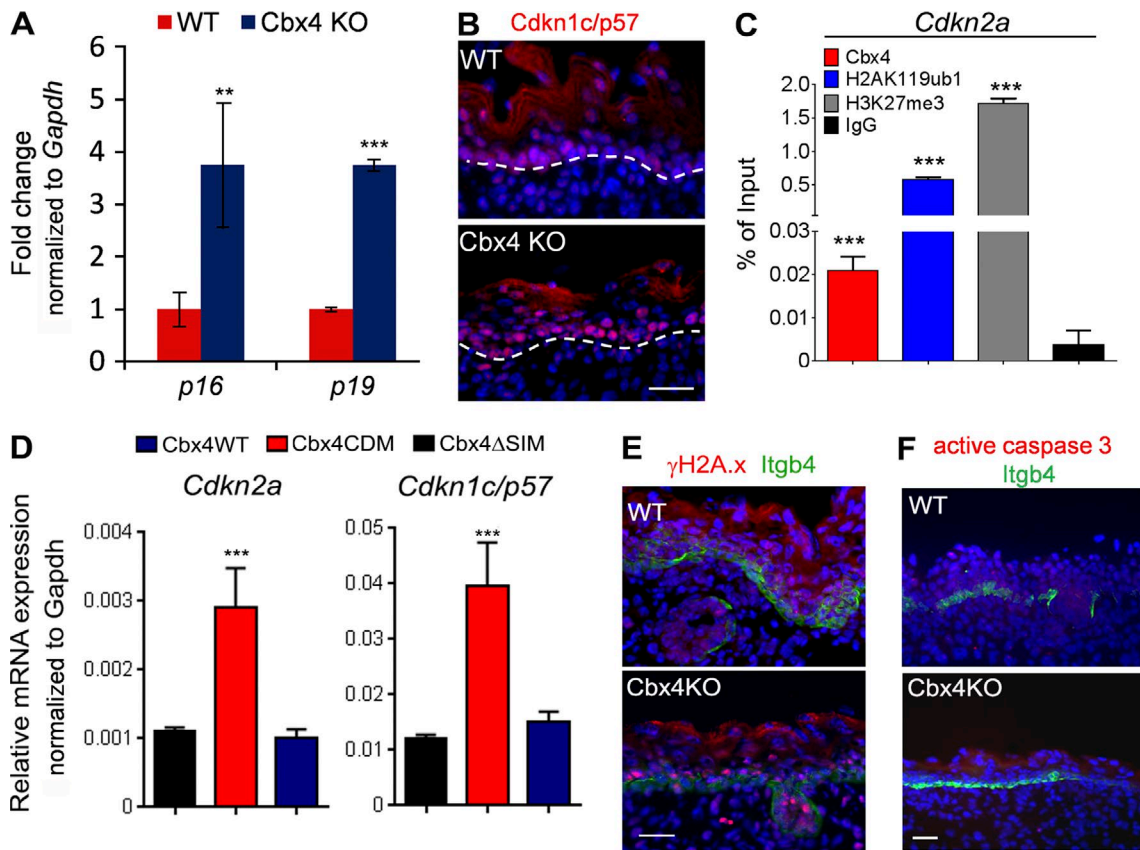

Figure S3. **Analyses of the senescence and apoptotic markers in WT and *Cbx4*-deficient skin.** (A) p16 and p19 transcript levels are significantly up-regulated in the epidermis of E16.5 *Cbx4*KO mice compared with WT controls (mean  $\pm$  SD;  $n = 3$ ). (B) Increased *Cdkn1c/p57* protein expression in the epidermis of E16.5 *Cbx4*KO mice. Dashed lines separate epidermis and dermis. (C) ChIP-qPCR analyses show an enrichment for Cbx4, H2AK119ub1, and H3K27me3 in the promoter region of the *Cdkn2a* gene in primary KCs (mean  $\pm$  SD;  $n = 3$ ). (D) Increase of the levels of the *Cdkn2a* and *Cdkn1c* transcripts in primary mouse KCs infected with retrovirus expressing a mutant *Cbx4* chromodomain (*Cbx4*CDM; mean  $\pm$  SD;  $n = 3$ ). (E) Appearance of  $\gamma$ -H2AX-positive cells in the epidermis of E16.5 *Cbx4*KO mice. Integrin- $\beta$ 4 (*Itgb4*) expression outlines the basement membrane of the epidermis. DAPI counterstain (blue) shows the nuclei. (F) A lack of caspase 3-positive cells in the epidermis of E16.5 WT and *Cbx4*KO mice. Integrin- $\beta$ 4 expression outlines the basement membrane of the epidermis. DAPI counterstain (blue) shows the nuclei. Bars, 50  $\mu$ m. \*\*,  $P < 0.01$ ; \*\*\*,  $P < 0.001$ .

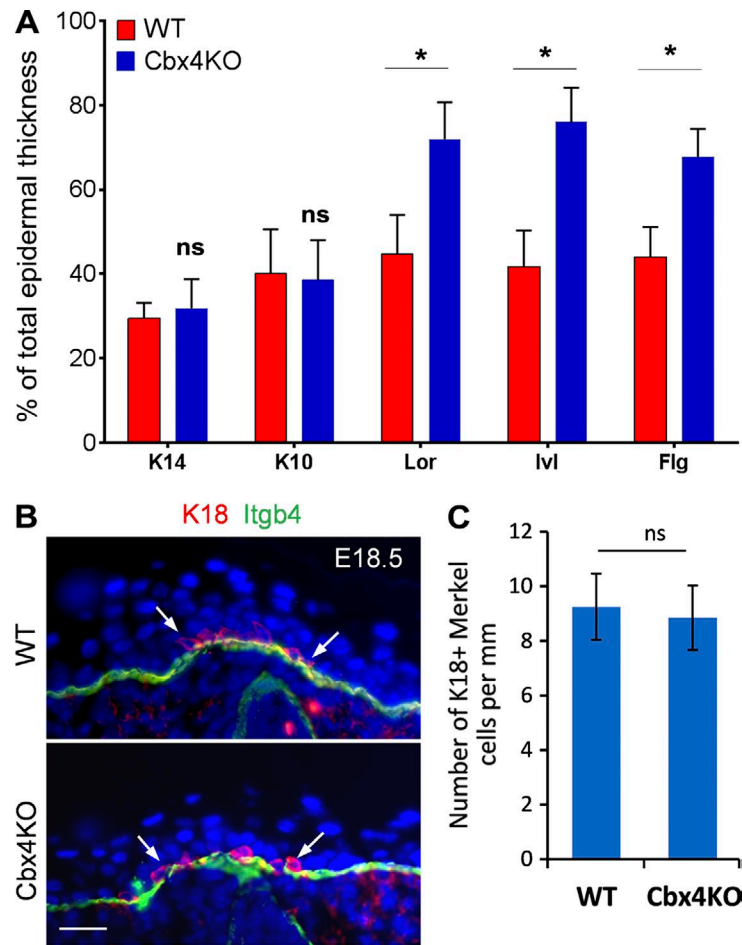

Figure S4. **The analyses of epidermal and Merkel cell differentiation in Cbx4KO and WT mice.** (A) Quantification of the ratios between different cellular layers expressing distinct markers of epidermal differentiation shows a significant increase of the cellular layers expressing the markers of terminal KC differentiation (Loricrin, Involucrin, and Filaggrin) in the epidermis of E16.5 Cbx4KO mice versus WT controls ( $P < 0.01$ ). (B and C) Immunofluorescence analyses of the Merkel cells expressing K18 (B, arrows) show a lack of differences between the epidermis of E16.5 Cbx4KO and WT mice. Integrin- $\beta$ 4 (Itgb4) expression outlines the basement membrane of the epidermis (C). DAPI counterstain (blue) shows the nuclei. Bar, 50  $\mu$ m. \*,  $P < 0.05$ . ns, not significant.

Table S1. Expression of PRC1 and PRC2 genes in epidermal progenitor cells at different stages of epidermal development

| Gene          | E11.5           |                   | E16.5           |                   | P1.5            |                   | P56             |                   |
|---------------|-----------------|-------------------|-----------------|-------------------|-----------------|-------------------|-----------------|-------------------|
|               | Absolute values | Normalized values |
| <b>PRC1</b>   |                 |                   |                 |                   |                 |                   |                 |                   |
| <i>Bmi1</i>   | 4,939           | 0.78              | 890             | 1.00              | 1,959           | 0.32              | 164.19          | 0.54              |
| <i>Cbx2</i>   | 10,576          | 2.69              | 2,616           | 2.64              | 7,870           | 1.96              | 1,062.61        | 0.40              |
| <i>Cbx4</i>   | 5,757           | 0.44              | 5,378           | 0.99              | 8,019           | 0.60              | 7,709.26        | 0.74              |
| <i>Cbx6</i>   | 26,436          | 1.18              | 4,686           | 1.61              | 39,345          | 1.67              | 196.33          | 0.57              |
| <i>Cbx7</i>   | 2,643           | 1.00              | 28              | 0.44              | 12,494          | 3.73              | 369.93          | 0.60              |
| <i>Cbx8</i>   | 3,995           | 2.38              | 2,623           | 3.58              | 1,548           | 1.03              | 21,910.41       | 0.59              |
| <i>Pcgf1</i>  | 3,271           | 1.27              | 114             | 0.24              | 4,264           | 2.26              | 7,096.51        | 3.64              |
| <i>Pcgf2</i>  | 387             | 1.02              | 22              | 1.21              | 384             | 0.92              | 230.91          | 0.72              |
| <i>Pcgf6</i>  | 1,816           | 0.58              | 354             | 0.71              | 1,662           | 0.49              | 1,946.37        | 0.65              |
| <i>Phc1</i>   | 29,160          | 1.75              | 135             | 0.17              | 68,436          | 3.99              | 10,662.08       | 1.47              |
| <i>Phf19</i>  | 1,053           | 0.56              | 196             | 0.83              | 1,198           | 0.55              | 788.60          | 0.51              |
| <i>Ring1</i>  | 1,179           | 1.16              | 69              | 0.44              | 1,831           | 1.51              | 728.27          | 0.59              |
| <i>Rnf2</i>   | 1,006           | 0.53              | 28              | 0.24              | 945             | 0.48              | 181.02          | 0.03              |
| <i>Rybp</i>   | 222             | 0.53              | 134             | 1.27              | 208             | 0.50              | 221.50          | 0.56              |
| <b>PRC2</b>   |                 |                   |                 |                   |                 |                   |                 |                   |
| <i>Eed</i>    | 2,095           | 0.51              | 91              | 1.17              | 1,960           | 0.44              | 3,339           | 0.67              |
| <i>Ezh1</i>   | 749             | 1.45              | 122             | 2.13              | 1,672           | 3.49              | 3,882           | 7.89              |
| <i>Ezh2</i>   | 2,341           | 0.43              | 484             | 1.36              | 1,098           | 0.20              | 671             | 0.12              |
| <i>Jarid2</i> | 8,854           | 4.31              | 4,561           | 2.08              | 11,294          | 5.55              | 304             | 0.18              |
| <i>Mtf2</i>   | 6,840           | 4.10              | 3,727           | 1.34              | 2,968           | 1.70              | 1,582           | 0.71              |
| <i>Mtf2</i>   | 17,216          | 3.74              | 885             | 1.72              | 6,605           | 1.26              | 2,960           | 0.67              |
| <i>Rbbp4</i>  | 28,626          | 2.36              | 10,711          | 2.67              | 6,897           | 0.62              | 4,209           | 0.34              |
| <i>Rbbp7</i>  | 36,889          | 0.59              | 5,890           | 0.65              | 15,775          | 0.24              | 9,247           | 0.12              |
| <i>Suz12</i>  | 14,478          | 0.82              | 2,603           | 0.92              | 4,917           | 0.33              | 1,909           | 0.12              |

Agilent Technologies whole genome microarray values: absolute expression levels (a.u.) and normalized to reference RNA.

Table S2. **Cbx4 target genes up-regulated in p63KO epidermal progenitor cells**

| Gene name            | p63 versus WT |
|----------------------|---------------|
| <i>O610040J01Rik</i> | 2.12          |
| <i>1700056E22Rik</i> | 3.42          |
| <i>Acot12</i>        | 3.04          |
| <i>Atp1a2</i>        | 2.13          |
| <i>BC051665</i>      | 7.15          |
| <i>C8b</i>           | 4.38          |
| <i>Cbr4</i>          | 2.4           |
| <i>Cfi</i>           | 2.01          |
| <i>Chmp2b</i>        | 7.78          |
| <i>Ckmt2</i>         | 2.33          |
| <i>Clybl</i>         | 5.01          |
| <i>Cpn2</i>          | 6.31          |
| <i>Ctdp1</i>         | 16.58         |
| <i>Cyp4f15</i>       | 2.21          |
| <i>Daglb</i>         | 12.98         |
| <i>Dmrt2</i>         | 95.42         |
| <i>Dmrt3</i>         | 5.63          |
| <i>Dpysl3</i>        | 3.11          |
| <i>Dtx1</i>          | 2.26          |
| <i>Dusp26</i>        | 4.37          |
| <i>Ehd3</i>          | 3.13          |
| <i>Elovl5</i>        | 2.47          |
| <i>Eml4</i>          | 5.7           |
| <i>Enpep</i>         | 50.8          |
| <i>Fer1l4</i>        | 2.62          |
| <i>Fez1</i>          | 3.97          |
| <i>Fndc3c1</i>       | 16.5          |
| <i>Foxp2</i>         | 2.16          |
| <i>Grem2</i>         | 28.43         |
| <i>Hpd</i>           | 3.47          |
| <i>Kcnq1</i>         | 2.99          |
| <i>L2hgdh</i>        | 2.52          |
| <i>Lect2</i>         | 8.96          |
| <i>Lpl</i>           | 2             |
| <i>Lrrc17</i>        | 3.18          |
| <i>Lypd1</i>         | 3.03          |
| <i>Mrps31</i>        | 2.02          |
| <i>Nefl</i>          | 23.26         |
| <i>Nsg1</i>          | 3.67          |
| <i>Pah</i>           | 114.77        |
| <i>Parp16</i>        | 4.35          |
| <i>Pcmd2</i>         | 3.3           |
| <i>Pdzrn3</i>        | 2.35          |
| <i>Pon1</i>          | 20.73         |
| <i>Psmc6</i>         | 2.34          |
| <i>Rasgef1b</i>      | 3.04          |
| <i>Rpap3</i>         | 3.04          |
| <i>Rwdd2a</i>        | 5.57          |
| <i>Rxrg</i>          | 2.97          |
| <i>Sfrp2</i>         | 3.34          |
| <i>Shisa2</i>        | 6.53          |
| <i>Slc37a3</i>       | 7.02          |
| <i>Slc6a12</i>       | 3.06          |
| <i>Slc9a2</i>        | 56.62         |
| <i>Slco2b1</i>       | 3.16          |
| <i>Sord</i>          | 4.33          |
| <i>Sox7</i>          | 21.69         |
| <i>Stc2</i>          | 25.25         |
| <i>Stmn4</i>         | 4.39          |
| <i>Sulf1</i>         | 5.77          |
| <i>Sulf2</i>         | 2.56          |

Table S2. **Cbx4 target genes up-regulated in p63KO epidermal progenitor cells (Continued)**

| Gene name            | p63 versus WT |
|----------------------|---------------|
| <i>Tdrd7</i>         | 2.82          |
| <i>Tmem132c</i>      | 8.1           |
| <i>Traf3</i>         | 3.54          |
| <i>Tshz3</i>         | 88.53         |
| <i>Tspan12</i>       | 10.11         |
| <i>Unc5cl</i>        | 2.71          |
| <i>Upb1</i>          | 2.16          |
| <i>Utp14b</i>        | 4.64          |
| <i>Zbp1</i>          | 135.35        |
| <i>Zfp518b</i>       | 5.81          |
| <i>Zfp521</i>        | 6.49          |
| <i>O61004OJ01Rik</i> | 10.01         |
| <i>1700056E22Rik</i> | 5.85          |

Table S3. **Primers used for qRT-PCR analyses**

| Gene                   | Oligos 5' - to -3'                                                         |
|------------------------|----------------------------------------------------------------------------|
| <b>qRT-PCR primers</b> |                                                                            |
| <i>Cbx4</i>            | AGTGGAGTATCTGGTAAATGGA<br>TCCTGCCTTCCCTGTTCTG                              |
| <i>Cdkn2a/p16</i>      | ATGGGTCGCAGGTTCTTGGT<br>ATCATCACCTGGTCCAGGATTCC                            |
| <i>Cdkn2d/p19</i>      | CCTTGCAGGTCATGATGTTTGG<br>CCAGGGCATTGACATCAGCA                             |
| <i>En2</i>             | CTTCTTCAGGTCCAGGT<br>CAAATCTTGATCTGAGACTCGT                                |
| <i>Flg</i>             | GAAGGAACTTCTGAAGGACAAC<br>TCCATCAGTCCACCATGCCTC                            |
| <i>Gapdh</i>           | GTGTTCTACCCCCAATGTG<br>AGGAGACAACCTGGTCTCA                                 |
| <i>Ivl</i>             | GCAGGAGAAGTAGATAGAG<br>TTAAGGAAGTGGATGG                                    |
| <i>Lhx4</i>            | CCGATGCAACAGATTCCC<br>GAAGCATCTGCAGCCAG                                    |
| <i>Kdm2b</i>           | GATGCTGAGCGGTATCATCCG<br>GAGACAGCGATCCATGAGCAG                             |
| <i>Mobp</i>            | CCAGGCTCTCAAGAACCAG<br>GGTCCACGATCTCAGCTT                                  |
| <i>Nefl</i>            | CGCCATGCAGGACACAATCA<br>GAGTAGCCGCTGGTTATGCT                               |
| <i>Neurog3</i>         | TCGTCTTACTGCCCGCTAC<br>CTAGGGCTTCCGGTTCACA                                 |
| <i>Olig2</i>           | TCCCAGAACCCGATGATCTT<br>CGTGGACGAGGACACAGTC                                |
| <i>Zeb2</i>            | ATTGCACATCAGACTTTGAGGAA<br>ATAATGGCCGTGTCGCTTCG                            |
| <b>Cloning primers</b> |                                                                            |
| <i>Cbx4</i> enhancer   | AATCGATAAGGATCCTTTGAGAACAGAACAAGGGT<br>AGGGCATCGGTCGACGGATTTCCAGACAGCCAAGG |
| <b>ChIP primers</b>    |                                                                            |
| <i>Cbx4</i>            | TGTGTCAAAGAGACTAAGGACAGC<br>AGCTCCAGTGCTCAGTGGTC                           |
| <i>Lor</i>             | ACCAGTTACCACTCTCCCA<br>GTCTGGTCTCTCCAGTTGGC                                |
| <i>Nefl</i>            | GTCAGAGTCCCGGCTATAA<br>AGCCGAACGAACTCATGGTG                                |
| <i>Cdkn2a</i>          | TCCCTCCGGTTAACTTTCGG<br>GCCTCGCCGATCTTCTATT                                |

Table S4. List of antibodies used in this study

| Antigen          | Application | Host   | Dilution    | Catalog number | Supplier                                                   |
|------------------|-------------|--------|-------------|----------------|------------------------------------------------------------|
| Caspase 3 active | IF          | Rabbit | 1:200       | ab13847        | Abcam                                                      |
| Cbx4             | ChIP        | Rabbit | 5 µg        | A302-355A      | Bethyl Laboratories, Inc.                                  |
| Cbx4             | IF          | Rabbit | 1:100       |                | This study/polyclonal antibody against amino acids 363–551 |
| CD104 (Itgb4)    | IF          | Rat    | 1:100       | 553745         | BD                                                         |
| Cdkn1c           | IF          | Rabbit | 1:100       | ab4058         | Abcam                                                      |
| Filaggrin        | IF          | Rabbit | 1:100       | sc-30230       | Santa Cruz Biotechnology, Inc.                             |
| gH2A.x           | IF          | Rabbit | 1:100       | 39117          | Active Motif                                               |
| H2AK119ub1       | IF/ChIP     | Rabbit | 1:200       | 8240s          | Cell Signaling Technology                                  |
| H3K27me3         | IF/ChIP     | Rabbit | 1:100; 5 µg | 39157          | Active Motif                                               |
| Involucrin       | IF          | Rabbit | 1:100       | ab53112        | Abcam                                                      |
| Ki67             | IF          | Rabbit | 1:100       | ab15580        | Abcam                                                      |
| Krt10            | IF          | Rabbit | 1:100       | ab76318        | Abcam                                                      |
| Krt14            | IF          | Rabbit | 1:100       | ab7800         | Abcam                                                      |
| Krt18            | IF          | Rabbit | 1:100       | sc-31700       | Santa Cruz Biotechnology, Inc.                             |
| Loricrin         | IF          | Rabbit | 1:1,000     | PRB-145P       | Covance                                                    |
| Nefl             | IF          | Rabbit | 0.111111    | NB300-131      | Novus Biologicals                                          |
| Ring1b           | IF          | Rabbit | 1:100       | 5694P          | Cell Signaling Technology                                  |

IF, immunofluorescence.

**Table S5 is supplied as a PDF and it shows Cbx4 target genes in epidermal KCs.**
