# Supplementary material for: Cbx4 maintains the epithelial lineage identity and cell proliferation in the developing stratified epithelium
Source: PubMed Central journal article supplement — J Cell Biol. 2016 Jan 4;212(1):77–89. doi: 10.1083/jcb.201506065 (PMC4700479; doi:10.1083/jcb.201506065), 2016-01-04
Supplement: JCB_201506065_TableS5.pdf [file JCB_201506065_TableS5.pdf]

Table S5. **Cbx4-dependent Polycomb targets in mouse epidermal progenitor cells**

| Gene name       | Description                                                                                                                                        | CBX4KO versus WT | Cbx4 ChIP-seq peak start | Cbx4 ChIP-seq peak end | H3K27me3 ChIP-seq peak start | H3K27me3 ChIP-seq peak end |
|-----------------|----------------------------------------------------------------------------------------------------------------------------------------------------|------------------|--------------------------|------------------------|------------------------------|----------------------------|
| <b>Abca8b</b>   | <b>ATP-binding cassette, sub-family A (ABC1), member 8b (Abca8b) [NM_013851]</b>                                                                   | 6.7              | 109891303                | 109892702              | 109892065                    | 109893060                  |
| <i>Abcb4</i>    | ATP-binding cassette, sub-family B (MDR/TAP), member 4 (Abcb4) [NM_008830]                                                                         | 166.7            | 8861441                  | 8862016                | 8893021                      | 8894618                    |
| <i>Ablim1</i>   | actin-binding LIM protein 1                                                                                                                        | 3.8              | 57377643                 | 57378322               | 57396863                     | 57400086                   |
| <i>Acaa2</i>    | acetyl-Coenzyme A acyltransferase 2 (mitochondrial 3-oxoacyl-Coenzyme A thiolase) (Acaa2), nuclear gene encoding mitochondrial protein [NM_177470] | 4.1              | 74965315                 | 74965865               | 74958473                     | 74960177                   |
| <i>Acacb</i>    | acetyl-Coenzyme A carboxylase beta (Acacb) [NM_133904]                                                                                             | 2.2              | 114614986                | 114615883              | 114595162                    | 114596740                  |
| <i>Accn1</i>    | amiloride-sensitive cation channel 1, neuronal (degenerin) (Accn1), transcript variant MDEG2 [NM_007384]                                           | 4.9              | 81757576                 | 81758271               | 81779017                     | 81782808                   |
| <i>Acot12</i>   | acyl-CoA thioesterase 12 (Acot12) [NM_028790]                                                                                                      | 6.7              | 91877528                 | 91878424               | 91880131                     | 91881976                   |
| <i>Actr3b</i>   | ARP3 actin-related protein 3B                                                                                                                      | 12.7             | 25274562                 | 25275337               | 25319588                     | 25321790                   |
| <i>Adam1b</i>   | a disintegrin and metallopeptidase domain 1b (Adam1b) [NM_172125]                                                                                  | 2.2              | 121943925                | 121945418              | 121952680                    | 121954960                  |
| <i>Adam23</i>   | a disintegrin and metallopeptidase domain 23 (Adam23), [NM_011780]                                                                                 | 26.8             | 63504710                 | 63505387               | 63491467                     | 63493602                   |
| <i>Adar</i>     | adenosine deaminase, RNA-specific (Adar), [NM_001038587]                                                                                           | 2.1              | 89428375                 | 89429316               | 89538275                     | 89541141                   |
| <i>Adck1</i>    | aarF domain containing kinase 1                                                                                                                    | 4                | 89609890                 | 89611017               | 89619351                     | 89620799                   |
| <b>Adck3</b>    | <b>aarF domain containing kinase 3 (Adck3), nuclear gene encoding mitochondrial protein, [NM_023341]</b>                                           | 59.7             | 182144228                | 182145215              | 182144274                    | 182147470                  |
| <i>Adcy1</i>    | adenylate cyclase 1 (Adcy1) [NM_009622]                                                                                                            | 6.1              | 7001305                  | 7002626                | 6962317                      | 6969103                    |
| <i>Adcy5</i>    | adenylate cyclase 5 (Adcy5) [NM_001012765]                                                                                                         | 8.3              | 35093984                 | 35094713               | 35152404                     | 35162296                   |
| <i>Adora2a</i>  | adenosine A2a receptor (Adora2a) [NM_009630]                                                                                                       | 3                | 74811436                 | 74812183               | 74766682                     | 74768072                   |
| <i>Adra1a</i>   | adrenergic receptor, alpha 1a (Adra1a) [NM_013461]                                                                                                 | 4.7              | 67326057                 | 67326796               | 67253722                     | 67257789                   |
| <b>Agap2</b>    | <b>ArfGAP with GTPase domain, ankyrin repeat and PH domain 2 (Agap2) [NM_001033263]</b>                                                            | 248.9            | 126511962                | 126513078              | 126511826                    | 126523218                  |
| <i>Agtr1a</i>   | angiotensin II receptor, type 1a (Agtr1a) [NM_177322]                                                                                              | 37.7             | 30431640                 | 30432259               | 30426387                     | 30427318                   |
| <i>Agxt2l1</i>  | alanine-glyoxylate aminotransferase 2-like 1 (Agxt2l1), [NM_027907]                                                                                | 2.8              | 130240502                | 130241157              | 130319828                    | 130321096                  |
| <i>Ajap1</i>    | adherens junction associated protein 1 (Ajap1) [NM_001099299]                                                                                      | 236.6            | 152828273                | 152829100              | 152860367                    | 152864210                  |
| <i>Aldh1a3</i>  | aldehyde dehydrogenase family 1, subfamily A3 (Aldh1a3) [NM_053080]                                                                                | 11.1             | 73659237                 | 73659977               | 73571152                     | 73574988                   |
| <i>Alk</i>      | anaplastic lymphoma kinase                                                                                                                         | 3.7              | 73011067                 | 73011737               | 72951844                     | 72954641                   |
| <b>Ambra1</b>   | <b>autophagy/beclin 1 regulator 1 (Ambra1), [NM_172669]</b>                                                                                        | 2.5              | 91612175                 | 91613104               | 91612325                     | 91614178                   |
| <i>Amfr</i>     | autocrine motility factor receptor (Amfr) [NM_011787]                                                                                              | 4.4              | 96547791                 | 96548361               | 96496004                     | 96499340                   |
| <i>Amz1</i>     | archaelysin family metallopeptidase 1 (Amz1) [NM_173405]                                                                                           | 7.1              | 141234507                | 141237202              | 141218947                    | 141221387                  |
| <i>Ank1</i>     | ankyrin 1, erythroid (Ank1), [NM_031158]                                                                                                           | 4.5              | 24114223                 | 24115251               | 24087878                     | 24089725                   |
| <i>Ank3</i>     | ankyrin 3, epithelial (Ank3), [NM_146005]                                                                                                          | 11.2             | 69074432                 | 69075199               | 68961340                     | 68962442                   |
| <i>Ankrd13a</i> | ankyrin repeat domain 13a (Ankrd13a) [NM_026718]                                                                                                   | 2.3              | 115206985                | 115208253              | 115211903                    | 115213547                  |
| <i>Ankrd44</i>  | ankyrin repeat domain 44                                                                                                                           | 3.7              | 54995259                 | 54995957               | 54924791                     | 54925936                   |
| <i>Anp32a</i>   | acidic (leucine-rich) nuclear phosphoprotein 32 family, member A (Anp32a) [NM_009672]                                                              | 2.5              | 62163331                 | 62164009               | 62194574                     | 62198289                   |
| <b>Antxr1</b>   | <b>anthrax toxin receptor 1 (Antxr1) [NM_054041]</b>                                                                                               | 3.5              | 87277754                 | 87278579               | 87276656                     | 87279278                   |
| <i>Anxa3</i>    | annexin A3 (Anxa3) [NM_013470]                                                                                                                     | 2.2              | 97241590                 | 97242268               | 97196666                     | 97197675                   |
| <i>Aox1</i>     | aldehyde oxidase 1 (Aox1) [NM_009676]                                                                                                              | 34               | 58081166                 | 58081703               | 58111530                     | 58112869                   |
| <i>Ap2s1</i>    | adaptor-related protein complex 2, sigma 1 subunit (Ap2s1) [NM_198613]                                                                             | 3.5              | 17332099                 | 17334982               | 17325884                     | 17331369                   |
| <i>Ap3b2</i>    | adaptor-related protein complex 3, beta 2 subunit (Ap3b2) [NM_021492]                                                                              | 488.9            | 88639909                 | 88641241               | 88628780                     | 88630699                   |
| <i>Ap3d1</i>    | adaptor-related protein complex 3, delta 1 subunit (Ap3d1) [NM_007460]                                                                             | 247.7            | 80195050                 | 80196513               | 80189143                     | 80194171                   |
| <i>Apob</i>     | apolipoprotein B (Apob) [NM_009693]                                                                                                                | 4.7              | 7994867                  | 7995900                | 8068552                      | 8069828                    |
| <b>Apol8</b>    | <b>apolipoprotein L 8</b>                                                                                                                          | 85.1             | 77582741                 | 77584070               | 77582767                     | 77584858                   |
| <b>Aqp12</b>    | <b>aquaporin 12 (Aqp12), [NM_177587]</b>                                                                                                           | 5.4              | 94930097                 | 94932003               | 94927326                     | 94934262                   |
| <i>Arf1</i>     | ADP-ribosylation factor 1 (Arf1), [NM_007476]                                                                                                      | 2.2              | 59065665                 | 59066434               | 59050447                     | 59059539                   |
| <i>Arhgap20</i> | Rho GTPase activating protein 20 (Arhgap20) [NM_175535]                                                                                            | 66.1             | 51504719                 | 51505324               | 51572515                     | 51575490                   |
| <i>Arhgef7</i>  | Rho guanine nucleotide exchange factor (GEF7) (Arhgef7), [NM_001113517]                                                                            | 9.9              | 11746678                 | 11748148               | 11729934                     | 11731640                   |
| <i>Arx</i>      | aristaless related homeobox (Arx) [NM_007492]                                                                                                      | 3.3              | 90629174                 | 90629640               | 90530192                     | 90536461                   |
| <i>Atf1</i>     | activating transcription factor 1 (Atf1) [NM_007497]                                                                                               | 2                | 100009921                | 100011245              | 100012144                    | 100013726                  |
| <i>Atp12a</i>   | ATPase, H/K transporting, nongastric, alpha                                                                                                        | 177.1            | 56948986                 | 56949621               | 56967874                     | 56969530                   |

|                      |                                                                                                         |             |                  |                  |                  |                  |
|----------------------|---------------------------------------------------------------------------------------------------------|-------------|------------------|------------------|------------------|------------------|
| <i>Atp1a2</i>        | polypeptide (Atp12a) [NM_138652]<br>ATPase, Na/K transporting, alpha 2 polypeptide (Atp1a2) [NM_178405] | 31.7        | 174215183        | 174216559        | 174228984        | 174232036        |
| <i>Atp2b1</i>        | ATPase, Ca <sup>+</sup> transporting, plasma membrane 1 (Atp2b1) [NM_026482]                            | 2.2         | 98464762         | 98465396         | 98199991         | 98201125         |
| <i>AW554918</i>      | expressed sequence AW554918 (AW554918) [NM_001033532]                                                   | 2.4         | 25276175         | 25276980         | 25177026         | 25177956         |
| <i>B230206H07Rik</i> | <b>RIKEN cDNA B230206H07 gene (B230206H07Rik), non-coding RNA [NR_033532]</b>                           | <b>25.4</b> | <b>148540503</b> | <b>148542216</b> | <b>148540344</b> | <b>148544615</b> |
| <i>B3gat2</i>        | beta-1,3-glucuronyltransferase 2 (glucuronosyltransferase S) (B3gat2) [NM_172124]                       | 5.3         | 23773502         | 23774309         | 23767388         | 23771402         |
| <i>BC018507</i>      | cDNA sequence BC018507 (BC018507) [NM_144837]                                                           | 4.2         | 70686081         | 70686844         | 70741015         | 70745284         |
| <i>BC051665</i>      | cDNA sequence BC051665 (BC051665) [NM_199148]                                                           | 21.4        | 60853246         | 60854165         | 60861555         | 60863611         |
| <i>Brap</i>          | BRCA1-associated protein (Brap) [NM_028227]                                                             | 2.3         | 122116137        | 122116861        | 122126705        | 122127577        |
| <i>Brms1l</i>        | breast cancer metastasis-suppressor 1-like (Brms1l) [NM_001037756]                                      | 5.5         | 56941393         | 56941929         | 56961074         | 56962599         |
| <i>Bves</i>          | blood vessel epicardial substance (Bves) [NM_024285]                                                    | 7.1         | 45071163         | 45072319         | 45054060         | 45056212         |
| <i>C030034L19Rik</i> | RIKEN cDNA C030034L19 gene                                                                              | 3.3         | 9450459          | 9451109          | 9431918          | 9433424          |
| <i>C130022K22Rik</i> | <b>RIKEN cDNA C130022K22 gene (C130022K22Rik) [NM_172730]</b>                                           | <b>2.8</b>  | <b>91815338</b>  | <b>91816125</b>  | <b>91812562</b>  | <b>91816568</b>  |
| <i>C1ql2</i>         | complement component 1, q subcomponent-like 2 (C1ql2) [NM_207233]                                       | 3.8         | 122278908        | 122279671        | 122234088        | 122240580        |
| <i>C1qtnf9</i>       | C1q and tumor necrosis factor-related protein 9 (C1qtnf9) [NM_183175]                                   | 11.1        | 61379361         | 61381649         | 61383482         | 61386250         |
| <i>C2cd4b</i>        | C2 calcium-dependent domain containing 4B (C2cd4b) [NM_001081314]                                       | 24.1        | 67517459         | 67518828         | 67606625         | 67609182         |
| <i>C8b</i>           | complement component 8, beta polypeptide (C8b) [NM_133882]                                              | 28.4        | 104445025        | 104445790        | 104433442        | 104434707        |
| <i>Cacng1</i>        | calcium channel, voltage-dependent, gamma subunit 1 (Cacng1) [NM_007582]                                | 3.4         | 107585222        | 107586059        | 107564348        | 107568533        |
| <i>Cacng8</i>        | calcium channel, voltage-dependent, gamma subunit 8 (Cacng8) [NM_133190]                                | 12.2        | 3368691          | 3369298          | 3364555          | 3367964          |
| <i>Calcr</i>         | <b>calcitonin receptor (Calcr), b [NM_007588]</b>                                                       | <b>9.4</b>  | <b>3713254</b>   | <b>3714814</b>   | <b>3713068</b>   | <b>3714926</b>   |
| <i>Cartpt</i>        | CART prepropeptide (Cartpt), [NM_013732]                                                                | 2.1         | 100715390        | 100716040        | 100668533        | 100671536        |
| <i>Casc1</i>         | cancer susceptibility candidate 1                                                                       | 2.8         | 145144930        | 145145695        | 145153407        | 145154461        |
| <i>Cbr4</i>          | carbonyl reductase 4 (Cbr4) [NM_145595]                                                                 | 5.7         | 64043033         | 64043783         | 63937548         | 63940073         |
| <i>Ccbe1</i>         | collagen and calcium binding EGF domains 1 (Ccbe1) [NM_178793]                                          | 2.1         | 66523434         | 66524483         | 66502971         | 66503954         |
| <i>Ccdc90a</i>       | coiled-coil domain containing 90A (Ccdc90a) [NM_001081059]                                              | 56.1        | 43644896         | 43645907         | 43666384         | 43668002         |
| <i>Cd93</i>          | CD93 antigen (Cd93) [NM_010740]                                                                         | 4.1         | 148275308        | 148275952        | 148266593        | 148269840        |
| <i>Cdc7</i>          | cell division cycle 7 ( <i>S. cerevisiae</i> ) (Cdc7) [NM_009863]                                       | 2.3         | 107484048        | 107484897        | 107431942        | 107433569        |
| <i>Cdca7l</i>        | cell division cycle-associated 7 like (Cdca7l) [NM_146040]                                              | 10.6        | 118974676        | 118975352        | 119008545        | 119010548        |
| <i>Cdh4</i>          | cadherin 4 (Cdh4) [NM_009867]                                                                           | 4.2         | 179203401        | 179205682        | 179174839        | 179180146        |
| <i>Cdkal1</i>        | CDK5 regulatory subunit associated protein 1-like 1 (Cdkal1) [NM_144536]                                | 4.4         | 29925470         | 29926121         | 29794265         | 29795233         |
| <i>Cdon</i>          | cell adhesion molecule-related/down-regulated by oncogenes (Cdon) [NM_021339]                           | 3.3         | 35216184         | 35216898         | 35220568         | 35221663         |
| <i>Cdyl2</i>         | chromodomain protein, Y chromosome-like 2 (Cdyl2) [NM_029441]                                           | 3.3         | 119262013        | 119262804        | 119173633        | 119175303        |
| <i>Ceacam19</i>      | <b>carcinoembryonic antigen-related cell adhesion molecule 19 (Ceacam19) [NM_177036]</b>                | <b>6.5</b>  | <b>20462795</b>  | <b>20464540</b>  | <b>20461980</b>  | <b>20464753</b>  |
| <i>Cenpf</i>         | centromere protein F (Cenpf) [NM_001081363]                                                             | 2.2         | 191509464        | 191510229        | 191503124        | 191504092        |
| <i>Cfi</i>           | complement component factor i (Cfi) [NM_007686]                                                         | 160.6       | 129552535        | 129553190        | 129550224        | 129551018        |
| <i>Chgb</i>          | chromogranin B (Chgb) [NM_007694]                                                                       | 5.2         | 132590732        | 132591513        | 132606618        | 132608242        |
| <i>Chmp2b</i>        | charged multivesicular body protein 2B (Chmp2b) [NM_026879]                                             | 2.1         | 65544952         | 65545623         | 65571578         | 65573518         |
| <i>Chordc1</i>       | cysteine and histidine-rich domain (CHORD)-containing, zinc-binding protein 1 (Chordc1) [NM_025844]     | 6.4         | 18104353         | 18105271         | 18061695         | 18062878         |
| <i>Chst12</i>        | carbohydrate sulfotransferase 12 (Chst12) [NM_021528]                                                   | 3.1         | 140964970        | 140966161        | 140968380        | 140970431        |
| <i>Ckmt2</i>         | creatine kinase, mitochondrial 2 (Ckmt2), nuclear gene encoding mitochondrial protein [NM_198415]       | 227.5       | 92028986         | 92030308         | 92048170         | 92050072         |
| <i>Clec16a</i>       | <b>C-type lectin domain family 16, member A (Clec16a), [NM_177562]</b>                                  | <b>5.9</b>  | <b>10609925</b>  | <b>10611544</b>  | <b>10609803</b>  | <b>10611867</b>  |
| <i>Clic6</i>         | chloride intracellular channel 6 (Clic6), nuclear gene encoding mitochondrial protein [NM_172469]       | 2.6         | 92524818         | 92526178         | 92497451         | 92500215         |
| <i>Cln8</i>          | <b>ceroid-lipofuscinosis, neuronal 8 (Cln8) [NM_012000]</b>                                             | <b>3.6</b>  | <b>14838933</b>  | <b>14840129</b>  | <b>14839039</b>  | <b>14840931</b>  |
| <i>Clybl</i>         | citrate lyase beta like (Clybl) [NM_029556]                                                             | 24.8        | 122632308        | 122633329        | 122570818        | 122572191        |
| <i>Cnksr3</i>        | Cnksr family member 3 (Cnksr3) [NM_172546]                                                              | 6.6         | 3082532          | 3083144          | 3150511          | 3151976          |
| <i>Cnr1</i>          | cannabinoid receptor 1 (brain) (Cnr1) [NM_007726]                                                       | 2.3         | 34030786         | 34032028         | 33994635         | 33995767         |
| <i>Cntn3</i>         | contactin 3 (Cntn3) [NM_008779]                                                                         | 2.4         | 102347283        | 102347929        | 102513536        | 102514888        |
| <i>Cog2</i>          | component of oligomeric Golgi complex 2 (Cog2)                                                          | 2.9         | 127022129        | 127022902        | 127034487        | 127035569        |

|                      |                                                                                                            |       |           |           |           |           |
|----------------------|------------------------------------------------------------------------------------------------------------|-------|-----------|-----------|-----------|-----------|
|                      | [NM_029746]                                                                                                |       |           |           |           |           |
| <i>Cog6</i>          | component of oligomeric Golgi complex 6 (Cog6)<br>[NM_026225]                                              | 2.9   | 52756565  | 52757205  | 52802557  | 52803626  |
| <i>Cog7</i>          | component of oligomeric Golgi complex 7 (Cog7)<br>[NM_001033318]                                           | 2.8   | 129094610 | 129095548 | 129143257 | 129144577 |
| <i>Col13a1</i>       | collagen, type XIII, alpha 1 (Col13a1) [NM_007731]                                                         | 12    | 61418621  | 61420135  | 61435861  | 61443604  |
| <i>Col14a1</i>       | collagen, type XIV, alpha 1 (Col14a1) [NM_181277]                                                          | 20.1  | 55185084  | 55185863  | 55137772  | 55141026  |
| <i>Corin</i>         | corin (Corin), [NM_016869]                                                                                 | 25.1  | 72911176  | 72911830  | 72893988  | 72896415  |
| <i>Cpn2</i>          | carboxypeptidase N, polypeptide 2 (Cpn2)<br>[NM_027904]                                                    | 137.6 | 30265239  | 30266075  | 30256568  | 30261523  |
| <i>Cryz</i>          | crystallin, zeta (Cryz) [NM_009968]                                                                        | 4.9   | 154243017 | 154243626 | 154210360 | 154211601 |
| <i>Ctdp1</i>         | CTD (C-terminal domain, RNA polymerase II,<br>polypeptide A) phosphatase, subunit 1 (Ctdp1)<br>[NM_026295] | 25    | 80673132  | 80674222  | 80687731  | 80689822  |
| <i>Ctnnd2</i>        | catenin (cadherin-associated protein), delta 2<br>(Ctnnd2) [NM_008729]                                     | 6.2   | 30143203  | 30144130  | 30101375  | 30104103  |
| <i>Cttn</i>          | cortactin (Cttn), [NM_007803]                                                                              | 3.2   | 151661814 | 151662852 | 151685467 | 151688252 |
| <i>Cutc</i>          | cutC copper transporter homolog ( <i>E. coli</i> ) (Cutc),<br>[NM_025530]                                  | 2.2   | 43813760  | 43815051  | 43808161  | 43809621  |
| <i>Cwc15</i>         | CWC15 homolog ( <i>S. cerevisiae</i> )                                                                     | 5.8   | 14337063  | 14338038  | 14359806  | 14363422  |
| <i>Cxcl12</i>        | chemokine (C-X-C motif) ligand 12 (Cxcl12),<br>[NM_001012477]                                              | 3.5   | 117099526 | 117100316 | 117115608 | 117120445 |
| <i>Cyb5b</i>         | cytochrome b5 type B (Cyb5b), nuclear gene<br>encoding mitochondrial protein [NM_025558]                   | 70.8  | 109677019 | 109678238 | 109728409 | 109730754 |
| <i>Cybrd1</i>        | cytochrome b reductase 1 (Cybrd1) [NM_028593]                                                              | 5.1   | 70983557  | 70984457  | 70981996  | 70984566  |
| <i>Cyp19a1</i>       | cytochrome P450, family 19, subfamily a,<br>polypeptide 1 (Cyp19a1) [NM_007810]                            | 347.4 | 54123560  | 54124297  | 54117520  | 54119036  |
| <i>Cyp2d22</i>       | cytochrome P450, family 2, subfamily d, polypeptide<br>22 (Cyp2d22), [NM_001163472]                        | 2.4   | 82201202  | 82202492  | 82202769  | 82205394  |
| <i>Cyp2d34</i>       | cytochrome P450, family 2, subfamily d, polypeptide<br>34 (Cyp2d34) [NM_145474]                            | 18.7  | 82467890  | 82468596  | 82467079  | 82468837  |
| <i>Cyp2d9</i>        | cytochrome P450, family 2, subfamily d, polypeptide<br>9 (Cyp2d9) [NM_010006]                              | 5.3   | 82293841  | 82294608  | 82271331  | 82273179  |
| <i>Cyp4f15</i>       | cytochrome P450, family 4, subfamily f, polypeptide<br>15 (Cyp4f15) [NM_134127]                            | 2.4   | 32812210  | 32813491  | 32812335  | 32813859  |
| <i>D030016E14Rik</i> | RIKEN cDNA D030016E14 gene (D030016E14Rik)<br>[NM_177240]                                                  | 325.4 | 48602856  | 48603637  | 48590517  | 48591751  |
| <i>D10Wsu102e</i>    | DNA segment, Chr 10, Wayne State University 102,<br>expressed (D10Wsu102e) [NM_026579]                     | 2.9   | 82867774  | 82868986  | 82867602  | 82868637  |
| <i>D1Pas1</i>        | DNA segment, Chr 1, Pasteur Institute 1 (D1Pas1)<br>[NM_033077]                                            | 2     | 188776272 | 188777281 | 188809717 | 188810850 |
| <i>D3Bwg0562e</i>    | DNA segment, Chr 3, Brigham & Women's Genetics<br>0562 expressed (D3Bwg0562e) [NM_177664]                  | 41    | 117062581 | 117063640 | 117062406 | 117064002 |
| <i>D6Wsu163e</i>     | DNA segment, Chr 6, Wayne State University 163,<br>expressed                                               | 5.8   | 126892081 | 126893185 | 126902043 | 126904143 |
| <i>Daam2</i>         | dishevelled associated activator of morphogenesis 2<br>(Daam2) [NM_001008231]                              | 4.7   | 49684920  | 49685951  | 49701309  | 49704335  |
| <i>Dab1</i>          | disabled homolog 1 ( <i>Drosophila</i> ) (Dab1),<br>[NM_177259]                                            | 3.5   | 103350573 | 103351235 | 103291416 | 103294850 |
| <i>Dact2</i>         | dapper homolog 2, antagonist of beta-catenin<br>( <i>Xenopus</i> ) (Dact2) [NM_172826]                     | 2.2   | 14312879  | 14313924  | 14332072  | 14335590  |
| <i>Daglb</i>         | diacylglycerol lipase, beta                                                                                | 15    | 144255269 | 144255881 | 144247629 | 144251414 |
| <i>Dao</i>           | D-amino acid oxidase (Dao) [NM_010018]                                                                     | 4.3   | 114459657 | 114460264 | 114457662 | 114458898 |
| <i>Dcaf12l2</i>      | DDB1 and CUL4 associated factor 12-like 2 (Dcaf12l2)<br>[NM_175539]                                        | 4.5   | 41726488  | 41726946  | 41720324  | 41722088  |
| <i>Dclre1a</i>       | DNA cross-link repair 1A, PSO2 homolog ( <i>S.</i><br><i>cerevisiae</i> ) (Dclre1a) [NM_018831]            | 2.1   | 56601784  | 56602327  | 56611934  | 56612796  |
| <i>Dcp1a</i>         | DCP1 decapping enzyme homolog A ( <i>S. cerevisiae</i> )<br>(Dcp1a) [NM_133761]                            | 9.3   | 31220319  | 31221039  | 31166631  | 31168523  |
| <i>Ddo</i>           | D-aspartate oxidase (Ddo) [NM_027442]                                                                      | 58.6  | 40327973  | 40328676  | 40349692  | 40351899  |
| <i>Dhrs7c</i>        | dehydrogenase/reductase (SDR family) member 7C<br>(Dhrs7c) [NM_001013013]                                  | 11.1  | 67629030  | 67630007  | 67627501  | 67629907  |
| <i>Dhtkd1</i>        | dehydrogenase E1 and transketolase domain<br>containing 1                                                  | 3.8   | 5853060   | 5853953   | 5848197   | 5851089   |
| <i>Dhx15</i>         | DEAH (Asp-Glu-Ala-His) box polypeptide 15 (Dhx15),<br>[NM_007839]                                          | 2.7   | 52492375  | 52493572  | 52519619  | 52520751  |
| <i>Dio3os</i>        | deiodinase, iodothyronine type III, opposite strand<br>(Dio3os), non-coding RNA [NR_002866]                | 128.5 | 111481076 | 111482560 | 111512540 | 111521526 |
| <i>Dirc2</i>         | disrupted in renal carcinoma 2 (human) (Dirc2)<br>[NM_153550]                                              | 2.8   | 35763802  | 35764494  | 35749125  | 35750301  |
| <i>DIK1</i>          | delta-like 1 homolog ( <i>Drosophila</i> )                                                                 | 16.3  | 110697606 | 110698629 | 110690011 | 110699920 |
| <i>Dmrt2</i>         | doublesex and mab-3 related transcription factor 2<br>(Dmrt2) [NM_145831]                                  | 41.7  | 25735078  | 25735740  | 25724174  | 25725445  |
| <i>Dmrt3</i>         | doublesex and mab-3 related transcription factor 3<br>(Dmrt3) [NM_177360]                                  | 3.3   | 25712535  | 25713239  | 25689401  | 25690588  |
| <i>Dock4</i>         | dedicator of cytokinesis 4 (Dock4) [NM_172803]                                                             | 11.4  | 41255227  | 41255892  | 41225286  | 41226753  |
| <i>Dock5</i>         | dedicator of cytokinesis 5 (Dock5) [NM_177780]                                                             | 103.7 | 68593078  | 68593625  | 68569101  | 68570132  |

|                      |                                                                                             |       |           |           |           |           |
|----------------------|---------------------------------------------------------------------------------------------|-------|-----------|-----------|-----------|-----------|
| <i>Dpf3</i>          | D4, zinc and double PHD fingers, family 3 (Dpf3) [NM_058212]                                | 7.2   | 84432221  | 84433547  | 84441161  | 84444461  |
| <i>Dpysl3</i>        | dihydropyrimidinase-like 3 (Dpysl3), [NM_009468]                                            | 2.6   | 43613083  | 43613553  | 43596761  | 43598667  |
| <i>Dtx1</i>          | deltex 1 homolog ( <i>Drosophila</i> ) (Dtx1) [NM_008052]                                   | 2.3   | 121172131 | 121172947 | 121168645 | 121171409 |
| <i>Dusp26</i>        | dual specificity phosphatase 26 (putative) (Dusp26) [NM_025869]                             | 9.3   | 32144360  | 32145495  | 32198334  | 32202891  |
| <i>Dync1i1</i>       | dynein cytoplasmic 1 intermediate chain 1 (Dync1i1), [NM_010063]                            | 67.3  | 5683181   | 5683938   | 5675465   | 5676737   |
| <i>E130203B14Rik</i> | RIKEN cDNA E130203B14 gene (E130203B14Rik) [NM_178791]                                      | 5.5   | 33682521  | 33683419  | 33671171  | 33675274  |
| <i>E2f6</i>          | E2F transcription factor 6 (E2f6), [NM_033270]                                              | 2.6   | 16828581  | 16829921  | 16831444  | 16832670  |
| <i>Ebf3</i>          | early B-cell factor 3 (Ebf3), [NM_010096]                                                   | 2.8   | 144495309 | 144496028 | 144500235 | 144502964 |
| <i>Eepd1</i>         | endonuclease/exonuclease/phosphatase family domain containing 1 (Eepd1) [NM_026189]         | 5.7   | 25294873  | 25295942  | 25183958  | 25186420  |
| <i>Efna5</i>         | ephrin A5 (Efna5), [NM_010109]                                                              | 2.4   | 62971932  | 62972586  | 63275746  | 63277334  |
| <i>Efnb2</i>         | ephrin B2 (Efnb2) [NM_010111]                                                               | 2.1   | 8583574   | 8584431   | 8576063   | 8577627   |
| <i>Ehd3</i>          | EH-domain containing 3 (Ehd3) [NM_020578]                                                   | 306.9 | 74148635  | 74149444  | 74153492  | 74155306  |
| <i>Eif2ak4</i>       | eukaryotic translation initiation factor 2 alpha kinase 4 (Eif2ak4), [NM_013719]            | 9.1   | 118233731 | 118234519 | 118233068 | 118234731 |
| <i>Eif2s2</i>        | eukaryotic translation initiation factor 2, subunit 2 (beta) (Eif2s2) [NM_026030]           | 5.2   | 154750435 | 154751031 | 154766880 | 154769061 |
| <i>Eif4g2</i>        | eukaryotic translation initiation factor 4, gamma 2 (Eif4g2), [NM_013507]                   | 5.2   | 118317135 | 118318392 | 118353426 | 118356815 |
| <i>Elov15</i>        | ELOVL family member 5, elongation of long chain fatty acids (yeast) (Elov15) [NM_134255]    | 30.5  | 77733902  | 77734540  | 77771344  | 77772606  |
| <i>Eml4</i>          | echinoderm microtubule associated protein like 4 (Eml4), [NM_199466]                        | 7.1   | 83801565  | 83802967  | 83801718  | 83802865  |
| <i>Emr1</i>          | EGF-like module containing, mucin-like, hormone receptor-like sequence 1 (Emr1) [NM_010130] | 5.1   | 57559259  | 57560072  | 57483307  | 57484654  |
| <i>Emx2</i>          | empty spiracles homolog 2 ( <i>Drosophila</i> ) (Emx2) [NM_010132]                          | 2     | 59610969  | 59611504  | 59541418  | 59547500  |
| <i>En2</i>           | engrailed 2 (En2) [NM_010134]                                                               | 189.5 | 28484078  | 28486270  | 28481211  | 28488209  |
| <i>Enpep</i>         | glutamyl aminopeptidase (Enpep) [NM_007934]                                                 | 18    | 129034175 | 129035102 | 129034285 | 129035969 |
| <i>Epb4.1l2</i>      | erythrocyte protein band 4.1-like 2 (Epb4.1l2), [NM_013511]                                 | 4.3   | 25053949  | 25054854  | 25154141  | 25155133  |
| <i>Epb4.1l3</i>      | erythrocyte protein band 4.1-like 3                                                         | 3     | 69448130  | 69449437  | 69456776  | 69458413  |
| <i>Epb4.1l4a</i>     | erythrocyte protein band 4.1-like 4a (Epb4.1l4a) [NM_013512]                                | 139.6 | 34132656  | 34133232  | 34145201  | 34148943  |
| <i>Esd</i>           | esterase D/formylglutathione hydrolase (Esd) [NM_016903]                                    | 11.9  | 75154806  | 75155736  | 75117393  | 75118826  |
| <i>Exoc6</i>         | exocyst complex component 6                                                                 | 7.4   | 37641605  | 37642303  | 37643554  | 37644547  |
| <i>Eya1</i>          | eyes absent 1 homolog ( <i>Drosophila</i> ) (Eya1), [NM_010164]                             | 2.6   | 14358181  | 14358709  | 14269082  | 14270000  |
| <i>Eya4</i>          | eyes absent 4 homolog ( <i>Drosophila</i> )                                                 | 14.5  | 23010080  | 23010634  | 23067603  | 23070902  |
| <i>Fabp1</i>         | fatty acid-binding protein 1, liver (Fabp1) [NM_017399]                                     | 13.1  | 71166592  | 71167421  | 71147233  | 71149277  |
| <i>Fads2</i>         | fatty acid desaturase 2 (Fads2) [NM_019699]                                                 | 2.2   | 10202221  | 10202877  | 10174289  | 10177255  |
| <i>Fam123a</i>       | family with sequence similarity 123, member A (Fam123a), [NM_028113]                        | 2.5   | 60940404  | 60941073  | 60995935  | 60999444  |
| <i>Fam13c</i>        | family with sequence similarity 13, member C (Fam13c), [NM_024244]                          | 2.1   | 69915365  | 69915978  | 69913619  | 69914682  |
| <i>Fam161b</i>       | family with sequence similarity 161, member B (Fam161b) [NM_172581]                         | 28.2  | 85713821  | 85714727  | 85711867  | 85714774  |
| <i>Fam168b</i>       | family with sequence similarity 168, member B (Fam168b), [NM_174997]                        | 2.9   | 34874041  | 34875605  | 34879765  | 34881931  |
| <i>Fam46c</i>        | family with sequence similarity 46, member C (Fam46c) [NM_001142952]                        | 24.4  | 100273078 | 100273897 | 100275638 | 100277848 |
| <i>Fam53a</i>        | family with sequence similarity 53, member A (Fam53a) [NM_178390]                           | 2.4   | 33967496  | 33968596  | 33954329  | 33956309  |
| <i>Fam76a</i>        | family with sequence similarity 76, member A (Fam76a), [NM_145553]                          | 2.2   | 132467943 | 132469029 | 132459804 | 132461821 |
| <i>Far1</i>          | fatty acyl CoA reductase 1                                                                  | 4.4   | 120649689 | 120650486 | 120649807 | 120650730 |
| <i>Fat3</i>          | FAT tumor suppressor homolog 3 ( <i>Drosophila</i> ) (Fat3) [NM_001080814]                  | 123.6 | 16122213  | 16122902  | 16128450  | 16129617  |
| <i>Fbxl17</i>        | F-box and leucine-rich repeat protein 17 (Fbxl17) [NM_015794]                               | 6.9   | 63881495  | 63882060  | 63772994  | 63774019  |
| <i>Fbxl22</i>        | F-box and leucine-rich repeat protein 22 (Fbxl22) [NM_175206]                               | 7.6   | 66307520  | 66308341  | 66351473  | 66353912  |
| <i>Fbxo10</i>        | F-box protein 10 (Fbxo10) [NM_001024142]                                                    | 97.8  | 45090369  | 45091208  | 45084181  | 45085647  |
| <i>Fer1l4</i>        | fer-1-like 4 ( <i>C. elegans</i> ) (Fer1l4) [NM_001136556]                                  | 3.3   | 155862521 | 155863473 | 155867863 | 155875932 |
| <i>Fez1</i>          | fasciculation and elongation protein zeta 1 (zygin I)                                       | 2.2   | 36672756  | 36673308  | 36639755  | 36642362  |
| <i>Ffar2</i>         | free fatty acid receptor 2 (Ffar2), [NM_146187]                                             | 197.3 | 31614394  | 31615194  | 31617204  | 31618194  |
| <i>Fgf5</i>          | fibroblast growth factor 5 (Fgf5) [NM_010203]                                               | 67.3  | 98703007  | 98703809  | 98684254  | 98685884  |
| <i>Fgf7</i>          | fibroblast growth factor 7 (Fgf7) [NM_008008]                                               | 12.5  | 125800809 | 125801659 | 125854461 | 125855509 |
| <i>Fgfr2</i>         | fibroblast growth factor receptor 2 (Fgfr2), [NM_010207]                                    | 6.1   | 140244618 | 140245749 | 140260858 | 140264353 |
| <i>Fgg</i>           | fibrinogen gamma chain (Fgg) [NM_133862]                                                    | 133.5 | 82816301  | 82817057  | 82798474  | 82800174  |

|                |                                                                                                                                     |       |           |           |           |           |
|----------------|-------------------------------------------------------------------------------------------------------------------------------------|-------|-----------|-----------|-----------|-----------|
| <i>Figl1</i>   | fidgetin-like 1 ( <i>Figl1</i> ), [NM_021891]                                                                                       | 4.5   | 11685597  | 11686692  | 11676316  | 11677899  |
| <i>Flt1</i>    | FMS-like tyrosine kinase 1                                                                                                          | 8.7   | 148441802 | 148443646 | 148536080 | 148539631 |
| <i>Fndc1</i>   | fibronectin type III domain containing 1 ( <i>Fndc1</i> )<br>[NM_001081416]                                                         | 2.1   | 7963942   | 7965415   | 8017678   | 8021460   |
| <i>Fndc3c1</i> | fibronectin type III domain containing 3C1 ( <i>Fndc3c1</i> )<br>[NM_001007580]                                                     | 44.1  | 103704651 | 103705485 | 103680247 | 103681824 |
| <i>Foxc1</i>   | forkhead box C1 ( <i>Foxc1</i> ) [NM_008592]                                                                                        | 7.6   | 31931485  | 31932573  | 31897160  | 31900990  |
| <i>Foxp2</i>   | forkhead box P2 ( <i>Foxp2</i> ), [NM_053242]                                                                                       | 2.4   | 14781006  | 14781545  | 14847899  | 14852567  |
| <i>Fras1</i>   | Fraser syndrome 1 homolog (human) ( <i>Fras1</i> )<br>[NM_175473]                                                                   | 2.2   | 96776911  | 96777726  | 96867388  | 96869253  |
| <i>Frmd6</i>   | FERM domain containing 6 ( <i>Frmd6</i> ) [NM_028127]                                                                               | 3.5   | 71865200  | 71865693  | 71978532  | 71980073  |
| <i>Frmpd3</i>  | FERM and PDZ domain containing 3 ( <i>Frmpd3</i> )<br>[NM_177750]                                                                   | 2     | 136940795 | 136941515 | 136876324 | 136877842 |
| <i>Ftcd</i>    | formiminotransferase cyclodeaminase ( <i>Ftcd</i> )<br>[NM_080845]                                                                  | 8.7   | 76043682  | 76044823  | 76037615  | 76040120  |
| <i>Fth1</i>    | ferritin heavy chain 1 ( <i>Fth1</i> ) [NM_010239]                                                                                  | 2.6   | 10045629  | 10046267  | 10028630  | 10029974  |
| <i>Fzd5</i>    | frizzled homolog 5 ( <i>Drosophila</i> ) ( <i>Fzd5</i> ),<br>[NM_022721]                                                            | 169.7 | 64790734  | 64791806  | 64835737  | 64838617  |
| <i>Gap43</i>   | growth associated protein 43 ( <i>Gap43</i> ) [NM_008083]                                                                           | 4.6   | 42371712  | 42372773  | 42291701  | 42292758  |
| <i>Gcap14</i>  | granule cell antiserum positive 14 ( <i>Gcap14</i> ),<br>[NM_027045]                                                                | 2.6   | 37799652  | 37800232  | 37787539  | 37788428  |
| <i>Gdf10</i>   | growth differentiation factor 10 ( <i>Gdf10</i> )<br>[NM_145741]                                                                    | 264.5 | 34727870  | 34728822  | 34735754  | 34739801  |
| <i>Ggnbp1</i>  | gametogenetin-binding protein 1                                                                                                     | 8.7   | 27123211  | 27124686  | 27124988  | 27126470  |
| <i>Gja8</i>    | gap junction protein, alpha 8 ( <i>Gja8</i> ) [NM_008123]                                                                           | 3.9   | 96733623  | 96735186  | 96722522  | 96724563  |
| <i>Gli3</i>    | GLI-Kruppel family member GLI3 ( <i>Gli3</i> ) [NM_008130]                                                                          | 3.1   | 15471609  | 15472464  | 15494123  | 15495767  |
| <i>Gm12824</i> | predicted gene 12824 ( <i>Gm12824</i> ) [NM_001085549]                                                                              | 62.1  | 114149735 | 114151297 | 114077993 | 114080364 |
| <i>Gm16532</i> | predicted gene, 16532 ( <i>Gm16532</i> ) [NM_001134752]                                                                             | 2.7   | 6376965   | 6378458   | 6367308   | 6368886   |
| <i>Gm608</i>   | predicted gene 608 ( <i>Gm608</i> ) [NM_001029889]                                                                                  | 8     | 44188670  | 44189320  | 44218289  | 44220169  |
| <i>Gm9725</i>  | predicted gene 9725                                                                                                                 | 3.6   | 83509006  | 83510432  | 83509359  | 83510823  |
| <i>Gmpr</i>    | guanosine monophosphate reductase ( <i>Gmpr</i> )<br>[NM_025508]                                                                    | 18.9  | 45687147  | 45687983  | 45610018  | 45612918  |
| <i>Got1</i>    | glutamate oxaloacetate transaminase 1, soluble<br>( <i>Got1</i> ) [NM_010324]                                                       | 19.7  | 43578850  | 43580519  | 43578258  | 43580563  |
| <i>Got2</i>    | glutamate oxaloacetate transaminase 2,<br>mitochondrial ( <i>Got2</i> ), nuclear gene encoding<br>mitochondrial protein [NM_010325] | 6.4   | 98447328  | 98448179  | 98431423  | 98433231  |
| <i>Gprc5b</i>  | G protein-coupled receptor, family C, group 5,<br>member B ( <i>Gprc5b</i> ), [NM_022420]                                           | 6.9   | 126147152 | 126148348 | 126153522 | 126156515 |
| <i>Grem2</i>   | gremlin 2 homolog, cysteine knot superfamily<br>( <i>Xenopus laevis</i> ) ( <i>Grem2</i> ) [NM_011825]                              | 3.2   | 176847002 | 176847697 | 176851288 | 176852334 |
| <i>Gria1</i>   | glutamate receptor, ionotropic, AMPA1 (alpha 1)<br>( <i>Gria1</i> ), [NM_008165]                                                    | 4.2   | 56823863  | 56824708  | 56824380  | 56825801  |
| <i>Grik4</i>   | glutamate receptor, ionotropic, kainate 4 ( <i>Grik4</i> )<br>[NM_175481]                                                           | 3.6   | 42798533  | 42799104  | 42757679  | 42759815  |
| <i>Gsdmc</i>   | gasdermin C ( <i>Gsdmc</i> ) [NM_031378]                                                                                            | 2     | 63579928  | 63580597  | 63527330  | 63528145  |
| <i>Gstm4</i>   | glutathione S-transferase, mu 4 ( <i>Gstm4</i> ),<br>[NM_026764]                                                                    | 4.9   | 107854243 | 107854753 | 107864574 | 107866436 |
| <i>Gtl3</i>    | gene trap locus 3 ( <i>Gtl3</i> ) [NM_008187]                                                                                       | 2.8   | 97970049  | 97971667  | 97934524  | 97936098  |
| <i>Gucy1b3</i> | guanylate cyclase 1, soluble, beta 3 ( <i>Gucy1b3</i> ),<br>[NM_017469]                                                             | 4.1   | 81868751  | 81869356  | 81877314  | 81879142  |
| <i>Gypc</i>    | glycophorin C ( <i>Gypc</i> ) [NM_001048207]                                                                                        | 23.8  | 32702088  | 32704674  | 32690768  | 32692830  |
| <i>Hacl1</i>   | 2-hydroxyacyl-CoA lyase 1 ( <i>Hacl1</i> ) [NM_019975]                                                                              | 4     | 32507537  | 32508222  | 32466193  | 32467519  |
| <i>Haus4</i>   | HAUS augmin-like complex, subunit 4 ( <i>Haus4</i> )<br>[NM_145462]                                                                 | 2.3   | 55162348  | 55163437  | 55162093  | 55163987  |
| <i>Hcfc1</i>   | host cell factor C1 ( <i>Hcfc1</i> ) [NM_008224]                                                                                    | 3     | 71209501  | 71210509  | 71192416  | 71196314  |
| <i>Hdgfrp3</i> | hepatoma-derived growth factor, related protein 3<br>( <i>Hdgfrp3</i> ) [NM_013886]                                                 | 17.3  | 89052416  | 89053205  | 89052101  | 89053290  |
| <i>Hif1an</i>  | hypoxia-inducible factor 1, alpha subunit inhibitor<br>( <i>Hif1an</i> ) [NM_176958]                                                | 3.8   | 44675593  | 44676812  | 44645343  | 44651562  |
| <i>Hmgb4</i>   | high-mobility group box 4 ( <i>Hmgb4</i> ) [NM_027036]                                                                              | 117.2 | 127927410 | 127929302 | 127927511 | 127929291 |
| <i>Hn1l</i>    | hematological and neurological expressed 1-like                                                                                     | 6.4   | 25123815  | 25125476  | 25118794  | 25120892  |
| <i>Hpd</i>     | 4-hydroxyphenylpyruvic acid dioxygenase ( <i>Hpd</i> )<br>[NM_008277]                                                               | 7.2   | 123651473 | 123652482 | 123630110 | 123633222 |
| <i>Hs3st2</i>  | heparan sulfate (glucosamine) 3-O-sulfotransferase 2<br>( <i>Hs3st2</i> ) [NM_001081327]                                            | 257.4 | 128540756 | 128541586 | 128534503 | 128537429 |
| <i>Htr4</i>    | 5 hydroxytryptamine (serotonin) receptor 4 ( <i>Htr4</i> )<br>[NM_008313]                                                           | 3.4   | 62544087  | 62544922  | 62482490  | 62485360  |
| <i>Htr7</i>    | 5-hydroxytryptamine (serotonin) receptor 7 ( <i>Htr7</i> )<br>[NM_008315]                                                           | 3.2   | 36076825  | 36077881  | 36130795  | 36132801  |
| <i>Ido2</i>    | indoleamine 2,3-dioxygenase 2 ( <i>Ido2</i> ) [NM_145949]                                                                           | 125.3 | 25671104  | 25672057  | 25655607  | 25658393  |
| <i>Igf1r</i>   | insulin-like growth factor I receptor ( <i>Igf1r</i> )<br>[NM_010513]                                                               | 3.6   | 75052750  | 75053930  | 75066616  | 75067918  |
| <i>Igfbp2</i>  | insulin-like growth factor-binding protein 2 ( <i>Igfbp2</i> )<br>[NM_008342]                                                       | 2.3   | 72831487  | 72832327  | 72859492  | 72860930  |
| <i>Igfbp5</i>  | insulin-like growth factor-binding protein 5 ( <i>Igfbp5</i> )<br>[NM_010518]                                                       | 2.6   | 72902175  | 72904233  | 72901792  | 72904275  |

|                  |                                                                                                                         |       |           |           |           |           |
|------------------|-------------------------------------------------------------------------------------------------------------------------|-------|-----------|-----------|-----------|-----------|
| <i>Igfbp7</i>    | insulin-like growth factor-binding protein 7 ( <i>Igfbp7</i> ), [NM_008048]                                             | 2.4   | 77845732  | 77846543  | 77836199  | 77837534  |
| <i>Igsf3</i>     | immunoglobulin superfamily, member 3 ( <i>Igsf3</i> ) [NM_207205]                                                       | 9.2   | 101229171 | 101230573 | 101167051 | 101167990 |
| <i>Ikzf1</i>     | IKAROS family zinc finger 1 ( <i>Ikzf1</i> ), [NM_001025597]                                                            | 2.6   | 11576327  | 11577006  | 11583999  | 11586982  |
| <i>Il20rb</i>    | interleukin 20 receptor beta                                                                                            | 3.1   | 100321309 | 100322281 | 100347806 | 100351652 |
| <i>Inhbb</i>     | inhibin beta-B ( <i>Inhbb</i> ) [NM_008381]                                                                             | 6     | 121220753 | 121221963 | 121312397 | 121323426 |
| <i>Irx1</i>      | Iroquois related homeobox 1 ( <i>Drosophila</i> ) ( <i>Irx1</i> ) [NM_010573]                                           | 2.4   | 72008261  | 72008897  | 72137243  | 72138356  |
| <i>Itpr1</i>     | inositol 1,4,5-trisphosphate receptor 1 ( <i>Itpr1</i> ) [NM_010585]                                                    | 5.6   | 108253257 | 108254218 | 108185448 | 108186597 |
| <i>Jakmip3</i>   | janus kinase and microtubule interacting protein 3 ( <i>Jakmip3</i> ) [NM_028708]                                       | 4.5   | 146147128 | 146148073 | 146130329 | 146134292 |
| <i>Jam2</i>      | junction adhesion molecule 2 ( <i>Jam2</i> ) [NM_023844]                                                                | 2.4   | 84766817  | 84767863  | 84773436  | 84775983  |
| <i>Jazf1</i>     | JAZF zinc finger 1 ( <i>Jazf1</i> ), [NM_001168277]                                                                     | 4.4   | 53009608  | 53010264  | 53045518  | 53047507  |
| <i>Jmjd1c</i>    | jumonji domain containing 1C ( <i>Jmjd1c</i> ), [NM_001242396]                                                          | 11.4  | 66486706  | 66487641  | 66501285  | 66502703  |
| <i>Kalrn</i>     | kalirin, RhoGEF kinase                                                                                                  | 8.2   | 34513770  | 34514770  | 34571523  | 34575143  |
| <i>Kank4</i>     | KN motif and ankyrin repeat domains 4 ( <i>Kank4</i> ) [NM_172872]                                                      | 2.1   | 98478472  | 98479270  | 98481626  | 98484986  |
| <i>Kcnh1</i>     | potassium voltage-gated channel, subfamily H (eag-related), member 1 ( <i>Kcnh1</i> ), [NM_010600]                      | 2.2   | 194089626 | 194091535 | 194013224 | 194016061 |
| <i>Kcnq1</i>     | potassium voltage-gated channel, subfamily Q, member 1 ( <i>Kcnq1</i> ) [NM_008434]                                     | 13.6  | 150345362 | 150346725 | 150290962 | 150299164 |
| <i>Kidins220</i> | kinase D-interacting substrate 220                                                                                      | 3.7   | 25623851  | 25624750  | 25625601  | 25628354  |
| <i>Kin</i>       | antigenic determinant of rec-A protein ( <i>Kin</i> ) [NM_025280]                                                       | 6     | 10011737  | 10012497  | 10020916  | 10022905  |
| <i>Kl</i>        | klotho ( <i>Kl</i> ) [NM_013823]                                                                                        | 2.1   | 151822790 | 151824028 | 151753829 | 151756806 |
| <i>Klc1</i>      | kinesin light chain 1 ( <i>Klc1</i> ), transcript variant a [NM_008450]                                                 | 2.8   | 113011867 | 113013700 | 112999760 | 113003044 |
| <i>Klk15</i>     | Kallikrein-related peptidase 15 ( <i>Klk15</i> ) [NM_174865]                                                            | 2.3   | 51189829  | 51190740  | 51182531  | 51184298  |
| <i>L2hgdh</i>    | L-2-hydroxyglutarate dehydrogenase ( <i>L2hgdh</i> ), nuclear gene encoding mitochondrial protein [NM_145443]           | 4.7   | 70805162  | 70805851  | 70804264  | 70805780  |
| <i>L3mbtl4</i>   | l(3)mbt-like 4 ( <i>Drosophila</i> ) ( <i>L3mbtl4</i> ) [NM_177278]                                                     | 8.3   | 68565539  | 68566145  | 68622543  | 68624748  |
| <i>Lca5</i>      | Leber congenital amaurosis 5 (human) ( <i>Lca5</i> ), [NM_027448]                                                       | 49.9  | 83287417  | 83288485  | 83336354  | 83338232  |
| <i>Ldb3</i>      | LIM domain-binding 3 ( <i>Ldb3</i> ), [NM_001039076]                                                                    | 12.7  | 35384535  | 35386246  | 35383474  | 35388061  |
| <i>Lect2</i>     | leukocyte cell-derived chemotaxin 2 ( <i>Lect2</i> ) [NM_010702]                                                        | 5.8   | 56650581  | 56651621  | 56639930  | 56641278  |
| <i>Lepr</i>      | leptin receptor ( <i>Lepr</i> ), [NM_001122899]                                                                         | 3.5   | 101377837 | 101378416 | 101389624 | 101390924 |
| <i>Lhx4</i>      | LIM homeobox protein 4 ( <i>Lhx4</i> ) [NM_010712]                                                                      | 7.6   | 157608115 | 157610195 | 157597261 | 157600966 |
| <i>Lonrf2</i>    | LON peptidase N-terminal domain and ring finger 2                                                                       | 5.2   | 38876503  | 38877031  | 38892288  | 38894129  |
| <i>Loxhd1</i>    | lipoygenase homology domains 1 ( <i>Loxhd1</i> ) [NM_172834]                                                            | 5.7   | 77530826  | 77532200  | 77546059  | 77548079  |
| <i>Lpl</i>       | lipoprotein lipase ( <i>Lpl</i> ) [NM_008509]                                                                           | 17.4  | 71398421  | 71399176  | 71439715  | 71440816  |
| <i>Lrrc17</i>    | leucine rich repeat-containing 17 ( <i>Lrrc17</i> ) [NM_028977]                                                         | 8.6   | 21037971  | 21039401  | 21052128  | 21053584  |
| <i>Lypd1</i>     | Ly6/Plaur domain containing 1 ( <i>Lypd1</i> ) [NM_145100]                                                              | 10.3  | 127859615 | 127860287 | 127806744 | 127810318 |
| <i>Lysmd4</i>    | LysM, putative peptidoglycan-binding, domain containing 4 ( <i>Lysmd4</i> ), transcript variant B [NM_175215]           | 4.5   | 74402698  | 74403340  | 74370565  | 74374961  |
| <i>Lyz1</i>      | lysozyme 1 ( <i>Lyz1</i> ) [NM_013590]                                                                                  | 12.9  | 116733084 | 116733732 | 116760805 | 116761840 |
| <i>Map2k6</i>    | mitogen-activated protein kinase kinase 6                                                                               | 179.2 | 110288160 | 110288852 | 110270122 | 110271403 |
| <i>Mapk8ip3</i>  | mitogen-activated protein kinase 8 interacting protein 3                                                                | 5.3   | 25066190  | 25067007  | 25060535  | 25062764  |
| <i>Mbnl2</i>     | muscleblind-like 2 ( <i>Mbnl2</i> ), [NM_175341]                                                                        | 10    | 120640871 | 120641782 | 120685157 | 120688978 |
| <i>Me2</i>       | malic enzyme 2, NAD(+)-dependent, mitochondrial ( <i>Me2</i> ), nuclear gene encoding mitochondrial protein [NM_145494] | 4.2   | 73950219  | 73950944  | 73964203  | 73966118  |
| <i>Mef2a</i>     | myocyte enhancer factor 2A                                                                                              | 2.8   | 74611293  | 74612542  | 74603472  | 74610028  |
| <i>Mobp</i>      | myelin-associated oligodendrocytic basic protein ( <i>Mobp</i> ), [NM_008614]                                           | 2.4   | 120057913 | 120058888 | 120057823 | 120058204 |
| <i>Mpp6</i>      | membrane protein, palmitoylated 6 (MAGUK p55 subfamily member 6) ( <i>Mpp6</i> ), [NM_019939]                           | 14.7  | 50122416  | 50123001  | 50077025  | 50078009  |
| <i>Mrps31</i>    | mitochondrial ribosomal protein S31 ( <i>Mrps31</i> ), nuclear gene encoding mitochondrial protein [NM_020560]          | 3.9   | 23540121  | 23541454  | 23538276  | 23539706  |
| <i>Msi2</i>      | Musashi homolog 2 ( <i>Drosophila</i> ) ( <i>Msi2</i> ) [NM_054043]                                                     | 337.3 | 88518467  | 88519509  | 88535906  | 88539975  |
| <i>Mtr</i>       | 5-methyltetrahydrofolate-homocysteine methyltransferase ( <i>Mtr</i> ) [NM_001081128]                                   | 2.5   | 12287214  | 12287912  | 12371967  | 12373022  |
| <i>Mvk</i>       | mevalonate kinase ( <i>Mvk</i> ) [NM_023556]                                                                            | 3.3   | 114944871 | 114945964 | 114913708 | 114918189 |
| <i>Myh10</i>     | myosin, heavy polypeptide 10, non-muscle ( <i>Myh10</i> ) [NM_175260]                                                   | 5.2   | 68515894  | 68516922  | 68504473  | 68507421  |
| <i>Myh11</i>     | myosin, heavy polypeptide 11, smooth muscle                                                                             | 210   | 14256302  | 14257046  | 14247607  | 14249400  |

|                |                                                                                                                          |       |           |           |           |           |
|----------------|--------------------------------------------------------------------------------------------------------------------------|-------|-----------|-----------|-----------|-----------|
|                | (Myh11), [NM_013607]                                                                                                     |       |           |           |           |           |
| <i>Myo18b</i>  | myosin XVIIIb (Myo18b) [NM_028901]                                                                                       | 12.9  | 113274311 | 113275702 | 113323254 | 113325971 |
| <i>Myof</i>    | myoferlin (Myof) [NM_001099634]                                                                                          | 5.2   | 38064418  | 38065072  | 37975240  | 37976374  |
| <i>Myom2</i>   | myomesin 2 (Myom2) [NM_008664]                                                                                           | 35.3  | 15071342  | 15072508  | 15062075  | 15064089  |
| <i>Myoz2</i>   | myozenin 2 (Myoz2) [NM_021503]                                                                                           | 45.3  | 122768849 | 122769657 | 122815157 | 122817559 |
| <i>Mypn</i>    | myopalladin (Mypn) [NM_182992]                                                                                           | 2.9   | 62667818  | 62668290  | 62641843  | 62642874  |
| <i>Myt1l</i>   | myelin transcription factor 1-like (Myt1l), [NM_001093775]                                                               | 5.5   | 30227435  | 30228320  | 30217742  | 30218910  |
| <i>N6amt1</i>  | N-6 adenine-specific DNA methyltransferase 1 (putative) (N6amt1), [NM_026366]                                            | 2     | 87344364  | 87344934  | 87364603  | 87365850  |
| <i>Nceh1</i>   | arylacetamide deacetylase-like 1 (Nceh1) [NM_178772]                                                                     | 15.3  | 27083360  | 27084812  | 27140041  | 27141112  |
| <i>Ndufa10</i> | NADH dehydrogenase (ubiquinone) 1 alpha subcomplex 10 (Ndufa10), nuclear gene encoding mitochondrial protein [NM_024197] | 28.3  | 94285435  | 94286312  | 94335874  | 94337883  |
| <i>Ndufs4</i>  | NADH dehydrogenase (ubiquinone) Fe-S protein 4 (Ndufs4), nuclear gene encoding mitochondrial protein [NM_010887]         | 4.3   | 115205499 | 115205968 | 115015936 | 115018014 |
| <i>Nefl</i>    | neurofilament, light polypeptide                                                                                         | 114.4 | 68719694  | 68720653  | 68700553  | 68703583  |
| <i>Neurl1a</i> | neuralized homolog 1A ( <i>Drosophila</i> ) (Neurl1a), [NM_021360]                                                       | 115.6 | 47340955  | 47343697  | 47272707  | 47278058  |
| <i>Neurog3</i> | neurogenin 3 (Neurog3) [NM_009719]                                                                                       | 2.3   | 61597781  | 61598205  | 61598214  | 61601237  |
| <i>Nhlrc2</i>  | NHL repeat containing 2 (Nhlrc2) [NM_025811]                                                                             | 2.3   | 56669000  | 56670066  | 56668860  | 56670686  |
| <i>Nid2</i>    | nidogen 2 (Nid2) [NM_008695]                                                                                             | 2.1   | 20565626  | 20566556  | 20569511  | 20572273  |
| <i>Nnt</i>     | nicotinamide nucleotide transhydrogenase (Nnt), nuclear gene encoding mitochondrial protein, [NM_008710]                 | 2.1   | 120115452 | 120116074 | 119974226 | 119975407 |
| <i>Npas1</i>   | neuronal PAS domain protein 1 (Npas1) [NM_008718]                                                                        | 2.3   | 17102916  | 17103985  | 17069471  | 17071861  |
| <i>Npffr1</i>  | neuropeptide FF receptor 1 (Npffr1) [NM_001177511]                                                                       | 2     | 61042759  | 61044727  | 61060244  | 61061792  |
| <i>Nr2c1</i>   | nuclear receptor subfamily 2, group C, member 1 (Nr2c1) [NM_011629]                                                      | 42    | 93615075  | 93615782  | 93623712  | 93624921  |
| <i>Nr5a1</i>   | nuclear receptor subfamily 5, group A, member 1                                                                          | 287.5 | 38585787  | 38586956  | 38573100  | 38577039  |
| <i>Nsg1</i>    | neuron specific gene family member 1 (Nsg1) [NM_010942]                                                                  | 8.5   | 38565633  | 38567183  | 38555105  | 38559587  |
| <i>Nt5dc3</i>  | 5'-nucleotidase domain containing 3 (Nt5dc3) [NM_175331]                                                                 | 16.9  | 86257433  | 86258331  | 86258485  | 86259833  |
| <i>Ntsr2</i>   | neurotensin receptor 2 (Ntsr2) [NM_008747]                                                                               | 120.7 | 16713871  | 16716406  | 16650161  | 16654444  |
| <i>Nup133</i>  | nucleoporin 133 (Nup133) [NM_172288]                                                                                     | 2.5   | 126458922 | 126459882 | 126480630 | 126487454 |
| <i>Nxph3</i>   | neurexophilin 3 (Nxph3) [NM_130858]                                                                                      | 2.2   | 95398542  | 95399698  | 95363289  | 95367036  |
| <i>Olig2</i>   | oligodendrocyte transcription factor 2 (Olig2) [NM_016967]                                                               | 256.5 | 91199887  | 91200861  | 91211585  | 91213042  |
| <i>Oxa1l</i>   | oxidase assembly 1-like (Oxa1l) [NM_026936]                                                                              | 3.1   | 55004266  | 55004743  | 54986095  | 54988697  |
| <i>Pag1</i>    | phosphoprotein associated with glycosphingolipid microdomains 1 (Pag1), transcript variant B [NM_053182]                 | 2.1   | 9861135   | 9862347   | 9861115   | 9862364   |
| <i>Pah</i>     | phenylalanine hydroxylase (Pah) [NM_008777]                                                                              | 525.8 | 87050656  | 87051277  | 86975737  | 86976803  |
| <i>Papss1</i>  | 3'-phosphoadenosine 5'-phosphosulfate synthase 1 (Papss1) [NM_011863]                                                    | 46.1  | 131264547 | 131265482 | 131275038 | 131277082 |
| <i>Parp1</i>   | poly (ADP-ribose) polymerase family, member 1 (Parp1) [NM_007415]                                                        | 2.3   | 182532915 | 182533856 | 182489678 | 182490796 |
| <i>Parp16</i>  | poly (ADP-ribose) polymerase family, member 16 (Parp16) [NM_177460]                                                      | 2.5   | 65077527  | 65078382  | 65055959  | 65057346  |
| <i>Pax3</i>    | paired box gene 3 (Pax3), [NM_008781]                                                                                    | 2.2   | 78230394  | 78231211  | 78188737  | 78190820  |
| <i>Pbx1</i>    | pre B cell leukemia homeobox 1                                                                                           | 5.7   | 170284194 | 170285502 | 170229335 | 170230730 |
| <i>Pccb</i>    | propionyl Coenzyme A carboxylase, beta polypeptide (Pccb), nuclear gene encoding mitochondrial protein [NM_025835]       | 169   | 100868046 | 100868925 | 100894207 | 100896938 |
| <i>Pcmt2</i>   | protein-L-isoaspartate (D-aspartate) O-methyltransferase domain containing 2 (Pcmt2) [NM_153594]                         | 7.4   | 181545434 | 181546821 | 181554288 | 181555163 |
| <i>Pdcd5</i>   | programmed cell death 5 (Pdcd5) [NM_019746]                                                                              | 2.2   | 36448760  | 36449940  | 36456491  | 36457533  |
| <i>Pdcl3</i>   | phosducin-like 3 (Pdcl3) [NM_026850]                                                                                     | 4.3   | 39021490  | 39022227  | 39072256  | 39073155  |
| <i>Pde11a</i>  | phosphodiesterase 11A                                                                                                    | 2.2   | 76164292  | 76164979  | 76175485  | 76178330  |
| <i>Pdgfra</i>  | platelet derived growth factor receptor, alpha polypeptide (Pdgfra), [NM_011058]                                         | 25.4  | 75623771  | 75624630  | 75548357  | 75553471  |
| <i>Pdhx</i>    | pyruvate dehydrogenase complex, component X (Pdhx), nuclear gene encoding mitochondrial protein [NM_175094]              | 4     | 102862778 | 102863499 | 102891410 | 102892788 |
| <i>Pdzrn3</i>  | PDZ domain containing RING finger 3 (Pdzrn3) [NM_018884]                                                                 | 2.3   | 101324609 | 101325326 | 101310422 | 101312243 |
| <i>Peg10</i>   | paternally expressed 10 (Peg10), [NM_001040611]                                                                          | 2     | 4703908   | 4705549   | 4703703   | 4705820   |
| <i>Peg3</i>    | paternally expressed 3                                                                                                   | 15.5  | 6677467   | 6678649   | 6669622   | 6670215   |
| <i>Pga5</i>    | pepsinogen 5, group I (Pga5) [NM_021453]                                                                                 | 13.3  | 10733698  | 10734592  | 10743178  | 10751732  |
| <i>Pgr</i>     | progesterone receptor (Pgr) [NM_008829]                                                                                  | 2.3   | 8842011   | 8842786   | 8899554   | 8902810   |
| <i>Phactr3</i> | phosphatase and actin regulator 3 (Phactr3),                                                                             | 49.3  | 177833783 | 177834478 | 177852099 | 177857713 |

|                 | [NM_028806]                                                                                                        |           |                 |                 |                 |                 |
|-----------------|--------------------------------------------------------------------------------------------------------------------|-----------|-----------------|-----------------|-----------------|-----------------|
| <i>Phf21b</i>   | PHD finger protein 21B (Phf21b), [NM_001081166]                                                                    | 84.6      | 84666055        | 84668729        | 84682658        | 84688580        |
| <i>Pik3c2g</i>  | phosphatidylinositol 3-kinase, C2 domain containing, gamma polypeptide (Pik3c2g), [NM_207683]                      | 18.7      | 139566825       | 139567648       | 139669441       | 139670803       |
| <i>Pip4k2a</i>  | phosphatidylinositol-5-phosphate 4-kinase, type II, alpha (Pip4k2a) [NM_008845]                                    | 38.7      | 18891866        | 18892415        | 18884656        | 18885826        |
| <i>Pitx2</i>    | paired-like homeodomain transcription factor 2 (Pitx2), [NM_001042502]                                             | 31        | 128880209       | 128880726       | 128901178       | 128903879       |
| <i>Pknox2</i>   | Pbx/knotted 1 homeobox 2 (Pknx2), [NM_001029838]                                                                   | 24.2      | 36921846        | 36922522        | 36951310        | 36956483        |
| <i>Plcl2</i>    | phospholipase C-like 2 (Plcl2) [NM_013880]                                                                         | 10.6      | 50739579        | 50740357        | 50647198        | 50649781        |
| <i>Plekha2</i>  | pleckstrin homology domain-containing, family A (phosphoinositide binding specific) member 2 (Plekha2) [NM_031257] | 2.5       | 26200876        | 26202097        | 26195153        | 26198150        |
| <i>Plekhf1</i>  | pleckstrin homology domain containing, family F (with FYVE domain) member 1 (Plekhf1) [NM_024413]                  | 2.5       | 39031317        | 39032390        | 39003471        | 39005901        |
| <i>Plg</i>      | plasminogen (Plg) [NM_008877]                                                                                      | 135       | 12556846        | 12557685        | 12575610        | 12577448        |
| <i>Pmaip1</i>   | phorbol-12-myristate-13-acetate-induced protein 1 (Pmaip1) [NM_021451]                                             | 3.3       | 66659490        | 66660132        | 66564817        | 66565842        |
| <i>Pmf1</i>     | polyamine-modulated factor 1 (Pmf1) [NM_025928]                                                                    | 3.2       | 88206045        | 88207671        | 88215151        | 88218284        |
| <i>Pon1</i>     | paraoxonase 1 (Pon1) [NM_011134]                                                                                   | 1400.9    | 5110007         | 5110666         | 5144250         | 5146366         |
| <i>Ppa2</i>     | pyrophosphatase (inorganic) 2                                                                                      | 5.6       | 132978635       | 132979414       | 132984079       | 132984966       |
| <i>Ppap2a</i>   | phosphatidic acid phosphatase type 2A (Ppap2a), [NM_008903]                                                        | 2.5       | 113606787       | 113607669       | 113625026       | 113625869       |
| <i>Ppapdc1a</i> | phosphatidic acid phosphatase type 2 domain containing 1A (Ppapdc1a) [NM_001080963]                                | 2.8       | 136364401       | 136366122       | 136398747       | 136401897       |
| <i>Ppm1a</i>    | protein phosphatase 1A, magnesium dependent, alpha isoform (Ppm1a) [NM_008910]                                     | 2.3       | 73908460        | 73908921        | 73929946        | 73934286        |
| <i>Ppm1h</i>    | protein phosphatase 1H (PP2C domain containing) (Ppm1h), [NM_176919]                                               | 2.7       | 122161096       | 122162033       | 122216165       | 122217917       |
| <i>Ppp2r5c</i>  | protein phosphatase 2, regulatory subunit B (B56), gamma isoform (Ppp2r5c), [NM_012023]                            | 5.5       | 111717397       | 111718609       | 111695847       | 111697422       |
| <i>Prdm15</i>   | PR domain containing 15 (Prdm15) [NM_144789]                                                                       | 3.2       | 98097628        | 98098250        | 98065976        | 98068422        |
| <i>Prkcq</i>    | protein kinase C, theta (Prkcq) [NM_008859]                                                                        | 2.9       | 11072294        | 11073133        | 11093493        | 11094542        |
| <i>Prox1</i>    | prospero homeobox 1                                                                                                | 117.1     | 192069048       | 192069954       | 191995614       | 192000125       |
| <i>Prr18</i>    | proline rich region 18 (Prr18), [NM_178774]                                                                        | 2.1       | 8520175         | 8521136         | 8531094         | 8537167         |
| <i>Prrx2</i>    | paired related homeobox 2                                                                                          | 3         | 30707710        | 30708812        | 30699093        | 30704729        |
| <i>Psmc6</i>    | proteasome (prosome, macropain) 26S subunit, non-ATPase, 6 (Psmc6) [NM_025550]                                     | 2.3       | 14927659        | 14928944        | 14931992        | 14933650        |
| <b>Pvalb</b>    | <b>parvalbumin (Pvalb) [NM_013645]</b>                                                                             | <b>21</b> | <b>78040416</b> | <b>78041912</b> | <b>78040353</b> | <b>78043272</b> |
| <i>Rab3ip</i>   | RAB3A interacting protein (Rab3ip) [NM_001003950]                                                                  | 6.1       | 116381938       | 116382679       | 116393943       | 116394870       |
| <i>Rab43</i>    | RAB43, member RAS oncogene family (Rab43), [NM_001039394]                                                          | 5.3       | 87750310        | 87751893        | 87770094        | 87772468        |
| <i>Rap1b</i>    | RAS related protein 1b (Rap1b) [NM_024457]                                                                         | 2.9       | 117340129       | 117340914       | 117258712       | 117259833       |
| <i>Rasgef1b</i> | RasGEF domain family, member 1B (Rasgef1b), [NM_181318]                                                            | 11.7      | 99598648        | 99599693        | 99804041        | 99806482        |
| <i>Rassf4</i>   | Ras association (RalGDS/AF-6) domain family member 4                                                               | 3.1       | 116633279       | 116634085       | 116622954       | 116625633       |
| <i>Rbfox1</i>   | RNA-binding protein, fox-1 homolog ( <i>C. elegans</i> ) 1 (Rbfox1), [NM_021477]                                   | 290.7     | 6861373         | 6862263         | 6348034         | 6349951         |
| <i>Rbms3</i>    | RNA-binding motif, single stranded interacting protein (Rbms3), [NM_178660]                                        | 3.8       | 117586506       | 117587301       | 117509630       | 117510430       |
| <i>Rcan2</i>    | regulator of calcineurin 2 (Rcan2), [NM_207649]                                                                    | 3         | 43986545        | 43987252        | 43937577        | 43939859        |
| <i>Rchy1</i>    | ring finger and CHY zinc finger domain-containing 1 (Rchy1) [NM_026557]                                            | 5.9       | 92320392        | 92320813        | 92199792        | 92200803        |
| <i>Rcn3</i>     | reticulocalbin 3, EF-hand calcium-binding domain (Rcn3) [NM_026555]                                                | 7.5       | 52350373        | 52351075        | 52341212        | 52344521        |
| <i>Rdh10</i>    | retinol dehydrogenase 10 (all-trans) (Rdh10) [NM_133832]                                                           | 2.7       | 16136475        | 16137404        | 16167444        | 16168397        |
| <i>Ret</i>      | ret proto-oncogene (Ret), [NM_009050]                                                                              | 2.2       | 118221375       | 118222141       | 118149621       | 118152069       |
| <i>Rhbdl3</i>   | rhomboid, veinlet-like 3 ( <i>Drosophila</i> ) (Rhbdl3) [NM_139228]                                                | 2         | 80091602        | 80092224        | 80122723        | 80126866        |
| <i>Ric8b</i>    | resistance to inhibitors of cholinesterase 8 homolog B ( <i>C. elegans</i> ) (Ric8b), [NM_001013441]               | 6.3       | 84400715        | 84401682        | 84370425        | 84373553        |
| <i>Rin2</i>     | Ras and Rab interactor 2                                                                                           | 2.3       | 145592917       | 145593820       | 145569037       | 145570481       |
| <i>Rnf157</i>   | ring finger protein 157                                                                                            | 4.5       | 116267699       | 116268494       | 116272782       | 116275328       |
| <i>Rnf165</i>   | ring finger protein 165 (Rnf165) [NM_001164504]                                                                    | 9.2       | 77713258        | 77714189        | 77801618        | 77805301        |
| <i>Rnf32</i>    | ring finger protein 32 (Rnf32) [NM_021470]                                                                         | 13.9      | 29485634        | 29486214        | 29333554        | 29334854        |
| <i>Rpap3</i>    | RNA polymerase II associated protein 3 (Rpap3) [NM_028003]                                                         | 2.7       | 97533439        | 97534668        | 97542011        | 97546544        |
| <i>Rpf1</i>     | ribosome production factor 1 homolog ( <i>S. cerevisiae</i> ) (Rpf1), [NM_027371]                                  | 2.3       | 146193413       | 146194874       | 146195607       | 146196914       |
| <i>Rps6kc1</i>  | ribosomal protein S6 kinase polypeptide 1 (Rps6kc1) [NM_178775]                                                    | 45.9      | 192689782       | 192691355       | 192728036       | 192729421       |
| <i>Rrm1</i>     | ribonucleotide reductase M1 (Rrm1) [NM_009103]                                                                     | 3.5       | 109553660       | 109554451       | 109578998       | 109580097       |
| <i>Rwdd2a</i>   | RWD domain containing 2A (Rwdd2a),                                                                                 | 2.3       | 86476580        | 86477203        | 86483967        | 86485385        |



|                |                                                                                                                              |       |           |           |           |           |
|----------------|------------------------------------------------------------------------------------------------------------------------------|-------|-----------|-----------|-----------|-----------|
|                | [NM_027100]                                                                                                                  |       |           |           |           |           |
| <i>Rxfp2</i>   | relaxin/insulin-like family peptide receptor 2 ( <i>Rxfp2</i> )<br>[NM_080468]                                               | 8.6   | 150808271 | 150809049 | 150831399 | 150834326 |
| <i>Rxrg</i>    | retinoid X receptor gamma ( <i>Rxrg</i> ), [NM_009107]                                                                       | 4.5   | 169521522 | 169522537 | 169527894 | 169530569 |
| <i>Sacs</i>    | sacsin                                                                                                                       | 22.1  | 61770961  | 61772474  | 61752904  | 61754399  |
| <i>Sall4</i>   | sal-like 4 ( <i>Drosophila</i> ) ( <i>Sall4</i> ), transcript variant a<br>[NM_175303]                                       | 7.1   | 168597976 | 168599032 | 168593361 | 168596448 |
| <i>Samd4</i>   | sterile alpha motif domain containing 4 ( <i>Samd4</i> ),<br>[NM_001037221]                                                  | 80.2  | 47540750  | 47542685  | 47514748  | 47516911  |
| <i>Scaf4</i>   | SR-related CTD-associated factor 4 ( <i>Scaf4</i> )<br>[NM_178923]                                                           | 163.8 | 90257532  | 90258555  | 90303225  | 90304465  |
| <i>Scrn1</i>   | secernin 1 ( <i>Scrn1</i> ) [NM_027268]                                                                                      | 124.3 | 54480848  | 54481914  | 54515265  | 54517194  |
| <i>Sesn3</i>   | sestrin 3 ( <i>Sesn3</i> ) [NM_030261]                                                                                       | 2.9   | 14036300  | 14036802  | 14039138  | 14040109  |
| <i>Setd2</i>   | SET domain containing 2 ( <i>Setd2</i> ) [NM_001081340]                                                                      | 2.8   | 110428106 | 110428910 | 110421097 | 110422707 |
| <i>Setd3</i>   | SET domain containing 3 ( <i>Setd3</i> ) [NM_028262]                                                                         | 3.7   | 109379727 | 109380645 | 109379723 | 109380639 |
| <i>Sfrp2</i>   | secreted frizzled-related protein 2 ( <i>Sfrp2</i> )<br>[NM_009144]                                                          | 2.9   | 83546186  | 83546894  | 83565426  | 83571568  |
| <i>Sgcd</i>    | sarcoglycan, delta (dystrophin-associated<br>glycoprotein) ( <i>Sgcd</i> ) [NM_011891]                                       | 4.1   | 47766766  | 47767550  | 47800643  | 47803327  |
| <i>Shisa2</i>  | shisa homolog 2 ( <i>Xenopus laevis</i> ) ( <i>Shisa2</i> )<br>[NM_145463]                                                   | 5.5   | 60236160  | 60237073  | 60243309  | 60247471  |
| <i>Shisa9</i>  | shisa homolog 9 ( <i>Xenopus laevis</i> ) ( <i>Shisa9</i> ),<br>[NM_001174086]                                               | 7     | 12052016  | 12052846  | 11982669  | 11989232  |
| <i>Shq1</i>    | SHQ1 homolog ( <i>S. cerevisiae</i> ) ( <i>Shq1</i> ) [NM_181590]                                                            | 3.9   | 100609868 | 100610936 | 100608716 | 100610547 |
| <i>Siglec5</i> | sialic acid-binding Ig-like lectin 5 ( <i>Siglec5</i> )<br>[NM_145581]                                                       | 3     | 50621866  | 50622457  | 50609751  | 50611451  |
| <i>Sirt2</i>   | sirtuin 2 (silent mating type information regulation 2,<br>homolog) 2 ( <i>S. cerevisiae</i> ) ( <i>Sirt2</i> ), [NM_022432] | 135.1 | 29543299  | 29545476  | 29540142  | 29548742  |
| <i>Slc10a7</i> | solute carrier family 10 (sodium/bile acid<br>cotransporter family), member 7 ( <i>Slc10a7</i> )<br>[NM_029736]              | 11.9  | 81060535  | 81061305  | 81096516  | 81099222  |
| <i>Slc19a3</i> | solute carrier family 19 (sodium/hydrogen<br>exchanger), member 3 ( <i>Slc19a3</i> ) [NM_030556]                             | 2.8   | 83056503  | 83057360  | 83041309  | 83042570  |
| <i>Slc22a1</i> | solute carrier family 22 (organic cation transporter),<br>member 1 ( <i>Slc22a1</i> ) [NM_009202]                            | 2.3   | 12848036  | 12849292  | 12877696  | 12882929  |
| <i>Slc22a3</i> | solute carrier family 22 (organic cation transporter),<br>member 3 ( <i>Slc22a3</i> ) [NM_011395]                            | 2.2   | 12695672  | 12696448  | 12699149  | 12702277  |
| <i>Slc35f1</i> | solute carrier family 35, member F1 ( <i>Slc35f1</i> )<br>[NM_178675]                                                        | 3.9   | 52471777  | 52472601  | 52409777  | 52411965  |
| <i>Slc36a3</i> | solute carrier family 36 (proton/amino acid<br>symporter), member 3 ( <i>Slc36a3</i> ) [NM_172258]                           | 2.2   | 54964093  | 54965918  | 54970483  | 54972033  |
| <i>Slc37a3</i> | solute carrier family 37 (glycerol-3-phosphate<br>transporter), member 3 ( <i>Slc37a3</i> ) [NM_028123]                      | 5.1   | 39285267  | 39286072  | 39283955  | 39286146  |
| <i>Slc38a1</i> | solute carrier family 38, member 1 ( <i>Slc38a1</i> ),<br>[NM_134086]                                                        | 51.1  | 96440511  | 96442054  | 96470972  | 96474286  |
| <i>Slc6a12</i> | solute carrier family 6 (neurotransmitter transporter,<br>betaine/GABA), member 12 ( <i>Slc6a12</i> ) [NM_133661]            | 32    | 121310087 | 121312397 | 121301439 | 121304278 |
| <i>Slc9a2</i>  | solute carrier family 9 (sodium/hydrogen exchanger),<br>member 2                                                             | 26.1  | 40751088  | 40751884  | 40737107  | 40740105  |
| <i>Slco2b1</i> | solute carrier organic anion transporter family,<br>member 2b1 ( <i>Slco2b1</i> ), [NM_175316]                               | 7.3   | 106855450 | 106858249 | 106852796 | 106862898 |
| <i>Slco3a1</i> | solute carrier organic anion transporter family,<br>member 3a1 ( <i>Slco3a1</i> ), [NM_023908]                               | 2.4   | 81684280  | 81684984  | 81651701  | 81653290  |
| <i>Slit2</i>   | slit homolog 2 ( <i>Drosophila</i> ) ( <i>Slit2</i> ) [NM_178804]                                                            | 4     | 48366533  | 48367568  | 48373568  | 48378181  |
| <i>Slit3</i>   | slit homolog 3 ( <i>Drosophila</i> ) ( <i>Slit3</i> ) [NM_011412]                                                            | 3.4   | 34892566  | 34893227  | 34933920  | 34938027  |
| <i>Smad1</i>   | MAD homolog 1 ( <i>Drosophila</i> ) ( <i>Smad1</i> ) [NM_008539]                                                             | 7.2   | 81987486  | 81988513  | 82016385  | 82018522  |
| <i>Smtnl1</i>  | smoothelin-like 1 ( <i>Smtnl1</i> ) [NM_024230]                                                                              | 15.2  | 84662732  | 84663871  | 84661047  | 84663518  |
| <i>Smyd3</i>   | SET and MYND domain containing 3 ( <i>Smyd3</i> )<br>[NM_027188]                                                             | 2.7   | 181416681 | 181417373 | 181198865 | 181200135 |
| <i>Sncaip</i>  | synuclein, alpha interacting protein (synphilin)<br>( <i>Sncaip</i> ), [NM_026408]                                           | 2.5   | 52965891  | 52966575  | 53028063  | 53029154  |
| <i>Snrnp48</i> | small nuclear ribonucleoprotein 48 (U11/U12)<br>( <i>Snrnp48</i> ) [NM_026382]                                               | 8.5   | 38311070  | 38311759  | 38352282  | 38354233  |
| <i>Snrpa1</i>  | small nuclear ribonucleoprotein polypeptide A'<br>( <i>Snrpa1</i> ) [NM_021336]                                              | 24.3  | 73146057  | 73146648  | 73177283  | 73182587  |
| <i>Sord</i>    | sorbitol dehydrogenase ( <i>Sord</i> ) [NM_146126]                                                                           | 3.1   | 122086937 | 122088462 | 122080826 | 122082442 |
| <i>Sox7</i>    | SRY (sex determining region Y)-box 7                                                                                         | 2.3   | 64575692  | 64577256  | 64566170  | 64568324  |
| <i>Spn</i>     | sialophorin ( <i>Spn</i> ), [NM_009259]                                                                                      | 176.8 | 134295696 | 134296324 | 134277437 | 134282166 |
| <i>Srebfb2</i> | sterol regulatory element-binding factor 2                                                                                   | 9.7   | 82000082  | 82001007  | 81970314  | 81972423  |
| <i>Srp9</i>    | signal recognition particle 9                                                                                                | 7.8   | 184057482 | 184058385 | 184028287 | 184031102 |
| <i>Srpk2</i>   | serine/arginine-rich protein specific kinase 2 ( <i>Srpk2</i> )<br>[NM_009274]                                               | 3.3   | 23193594  | 23194284  | 23197396  | 23198313  |
| <i>Srrm4</i>   | serine/arginine repetitive matrix 4 ( <i>Srrm4</i> )<br>[NM_026886]                                                          | 3.1   | 117030794 | 117032320 | 117040599 | 117044462 |
| <i>St3gal5</i> | ST3 beta-galactoside alpha-2,3-sialyltransferase 5<br>( <i>St3gal5</i> ), [NM_011375]                                        | 18.3  | 71999875  | 72001146  | 72030457  | 72031949  |
| <i>St7</i>     | suppression of tumorigenicity 7                                                                                              | 3.5   | 17631194  | 17632402  | 17631278  | 17632316  |

|                  |                                                                                                                   |             |                 |                 |                 |                 |
|------------------|-------------------------------------------------------------------------------------------------------------------|-------------|-----------------|-----------------|-----------------|-----------------|
| <i>Stbd1</i>     | starch-binding domain 1 (Stbd1) [NM_175096]                                                                       | 4.2         | 93013372        | 93013966        | 93013994        | 93015511        |
| <i>Stc2</i>      | stanniocalcin 2 (Stc2) [NM_011491]                                                                                | 73          | 31313202        | 31314557        | 31259329        | 31261702        |
| <i>Steap3</i>    | STEAP family member 3                                                                                             | 238         | 122190287       | 122191124       | 122183513       | 122185343       |
| <i>Stk35</i>     | serine/threonine kinase 35 (Stk35), [NM_183262]                                                                   | 4.9         | 129685713       | 129686506       | 129654009       | 129657780       |
| <i>Stmn2</i>     | <b>stathmin-like 2 (Stmn2) [NM_025285]</b>                                                                        | <b>2.6</b>  | <b>8510031</b>  | <b>8511800</b>  | <b>8509904</b>  | <b>8512007</b>  |
| <i>Stmn4</i>     | stathmin-like 4 (Stmn4) [NM_019675]                                                                               | 8.3         | 67032419        | 67033089        | 66962049        | 66964796        |
| <i>Stox2</i>     | storkhead box 2 (Stox2), [NM_175162]                                                                              | 11.8        | 48441583        | 48442320        | 48433051        | 48435200        |
| <i>Stx17</i>     | syntaxin 17 (Stx17) [NM_026343]                                                                                   | 4.7         | 48153216        | 48153788        | 48114122        | 48115740        |
| <i>Sub1</i>      | SUB1 homolog ( <i>S. cerevisiae</i> ) (Sub1) [NM_011294]                                                          | 2           | 11985035        | 11985867        | 11968636        | 11970295        |
| <i>Sucg1</i>     | succinate-CoA ligase, GDP-forming, alpha subunit (Sucg1), nuclear gene encoding mitochondrial protein [NM_019879] | 10          | 73228996        | 73230031        | 73221259        | 73223123        |
| <i>Sulf1</i>     | sulfatase 1 (Sulf1), [NM_172294]                                                                                  | 2.8         | 12808021        | 12808857        | 12825256        | 12826913        |
| <i>Sulf2</i>     | sulfatase 2 (Sulf2), [NM_028072]                                                                                  | 2.2         | 165917316       | 165919880       | 165973962       | 165978031       |
| <i>Svep1</i>     | sushi, von Willebrand factor type A, EGF and pentraxin domain containing 1 (Svep1) [NM_022814]                    | 9.4         | 58206952        | 58207823        | 58218052        | 58220273        |
| <i>Svil</i>      | <b>supervillin</b>                                                                                                | <b>4</b>    | <b>4944264</b>  | <b>4945633</b>  | <b>4944345</b>  | <b>4945694</b>  |
| <i>Synpo2</i>    | synaptopodin 2                                                                                                    | 138.8       | 122867058       | 122867794       | 122885450       | 122886646       |
| <i>Syt3</i>      | synaptotagmin III (Syt3), [NM_016663]                                                                             | 2.3         | 51625271        | 51626234        | 51605281        | 51617079        |
| <i>Tac1</i>      | <b>tachykinin 1 (Tac1) [NM_009311]</b>                                                                            | <b>2</b>    | <b>7503807</b>  | <b>7505601</b>  | <b>7503957</b>  | <b>7507059</b>  |
| <i>Tbc1d2</i>    | TBC1 domain family, member 2 (Tbc1d2) [NM_198664]                                                                 | 126.4       | 46693161        | 46694221        | 46654111        | 46659735        |
| <i>Tbc1d21</i>   | TBC1 domain family, member 21                                                                                     | 7.4         | 58198675        | 58199823        | 58226243        | 58227483        |
| <i>Tbc1d4</i>    | TBC1 domain family, member 4 (Tbc1d4) [NM_001081278]                                                              | 3.3         | 101971461       | 101972283       | 101912381       | 101913466       |
| <i>Tbx15</i>     | T-box 15 (Tbx15) [NM_009323]                                                                                      | 2.6         | 99100098        | 99101303        | 99042053        | 99047264        |
| <i>Tdrd7</i>     | tudor domain containing 7 (Tdrd7) [NM_146142]                                                                     | 2.8         | 45990976        | 45991755        | 45976944        | 45978797        |
| <i>Tlx1</i>      | T-cell leukemia, homeobox 1 (Tlx1) [NM_021901]                                                                    | 4.3         | 45208155        | 45208799        | 45214300        | 45223545        |
| <i>Tmem119</i>   | transmembrane protein 119 (Tmem119) [NM_146162]                                                                   | 3.7         | 114256923       | 114258622       | 114262610       | 114267333       |
| <i>Tmem132b</i>  | transmembrane protein 132B (Tmem132b) [NM_001190352]                                                              | 241.2       | 126052235       | 126053318       | 126267198       | 126268640       |
| <i>Tmem132c</i>  | transmembrane protein 132C (Tmem132c) [NM_175432]                                                                 | 18.4        | 127665627       | 127666494       | 127720669       | 127725331       |
| <i>Tmem2</i>     | transmembrane protein 2 (Tmem2), [NM_031997]                                                                      | 2.2         | 21881677        | 21882472        | 21890257        | 21891340        |
| <i>Tmod1</i>     | tropomodulin 1                                                                                                    | 2.7         | 46036680        | 46037538        | 46051482        | 46057425        |
| <i>Tmod2</i>     | tropomodulin 2 (Tmod2), [NM_001038710]                                                                            | 3.3         | 75445942        | 75446695        | 75457886        | 75459846        |
| <i>Tnks</i>      | tankyrase, TRF1-interacting ankyrin-related ADP-ribose polymerase                                                 | 23.6        | 36106211        | 36106877        | 36174080        | 36175636        |
| <i>Tox3</i>      | TOX high mobility group box family member 3 (Tox3) [NM_172913]                                                    | 100.1       | 92824093        | 92824894        | 92870137        | 92873228        |
| <i>Traf3</i>     | TNF receptor-associated factor 3 (Traf3), [NM_011632]                                                             | 2.3         | 112408784       | 112409386       | 112397726       | 112401303       |
| <i>Trak1</i>     | trafficking protein, kinesin binding 1                                                                            | 2.2         | 121198097       | 121199100       | 121200754       | 121205400       |
| <i>Trappc9</i>   | trafficking protein particle complex 9                                                                            | 2           | 72853465        | 72856144        | 72881432        | 72885933        |
| <i>Trdn</i>      | triadin (Trdn) [NM_029726]                                                                                        | 8.1         | 32791136        | 32791832        | 33059512        | 33060737        |
| <i>Trem1</i>     | <b>triggering receptor expressed on myeloid cells-like 1 (Trem1) [NM_027763]</b>                                  | <b>31.6</b> | <b>48504602</b> | <b>48506848</b> | <b>48504585</b> | <b>48506412</b> |
| <i>Trerf1</i>    | transcriptional regulating factor 1 (Trerf1), [NM_172622]                                                         | 7           | 47259860        | 47261139        | 47303358        | 47307707        |
| <i>Trib2</i>     | tribbles homolog 2 ( <i>Drosophila</i> ) (Trib2) [NM_144551]                                                      | 5.5         | 15748885        | 15749533        | 15821023        | 15824594        |
| <i>Trim45</i>    | tripartite motif-containing 45 (Trim45), [NM_194343]                                                              | 3.8         | 100687232       | 100688046       | 100731680       | 100732667       |
| <i>Trim54</i>    | <b>tripartite motif-containing 54 (Trim54) [NM_021447]</b>                                                        | <b>31.9</b> | <b>31418882</b> | <b>31419870</b> | <b>31418522</b> | <b>31419723</b> |
| <i>Trim67</i>    | tripartite motif-containing 67 (Trim67) [NM_198632]                                                               | 25.9        | 127306430       | 127308157       | 127315282       | 127323249       |
| <i>Tro</i>       | trophinin (Tro), [NM_019548]                                                                                      | 4           | 147088514       | 147089026       | 147090537       | 147092393       |
| <i>Trp53inp2</i> | transformation related protein 53 inducible nuclear protein 2 (Trp53inp2) [NM_178111]                             | 4.5         | 155240600       | 155241406       | 155201450       | 155203740       |
| <i>Trpc1</i>     | transient receptor potential cation channel, subfamily C, member 1                                                | 3.2         | 95600582        | 95601311        | 95649515        | 95651198        |
| <i>Trpc7</i>     | transient receptor potential cation channel, subfamily C, member 7 (Trpc7) [NM_012035]                            | 4.5         | 56951110        | 56952192        | 56906011        | 56909110        |
| <i>Tshz1</i>     | teashirt zinc finger family member 1 (Tshz1) [NM_001081300]                                                       | 4           | 84246540        | 84247476        | 84220230        | 84222053        |
| <i>Tshz2</i>     | teashirt zinc finger family member 2 (Tshz2) [NM_080455]                                                          | 9.8         | 169498981       | 169499691       | 169457535       | 169460201       |
| <i>Tshz3</i>     | <b>teashirt zinc finger family member 3 (Tshz3) [NM_172298]</b>                                                   | <b>2.2</b>  | <b>37492733</b> | <b>37493765</b> | <b>37492700</b> | <b>37493939</b> |
| <i>Tspan3</i>    | tetraspanin 3 (Tspan3) [NM_019793]                                                                                | 10.7        | 55989486        | 55990071        | 56038884        | 56041411        |
| <i>Tspan8</i>    | tetraspanin 8 (Tspan8), [NM_146010]                                                                               | 4.2         | 115221521       | 115222082       | 115216920       | 115218216       |
| <i>Ttc30a1</i>   | tetratricopeptide repeat domain 30A1 (Ttc30a1) [NM_030188]                                                        | 2.2         | 75871508        | 75872120        | 75834579        | 75836837        |
| <i>Ttc32</i>     | tetratricopeptide repeat domain 32 (Ttc32) [NM_029321]                                                            | 12.4        | 9106720         | 9107553         | 9056130         | 9062166         |
| <i>Ttc4</i>      | tetratricopeptide repeat domain 4 (Ttc4), [NM_028209]                                                             | 10          | 106366049       | 106368582       | 106354054       | 106355526       |
| <i>Ttc7b</i>     | tetratricopeptide repeat domain 7B (Ttc7b)                                                                        | 4.1         | 101736979       | 101738322       | 101716041       | 101721532       |

|                      |                                                                                                    |              |                  |                  |                  |                  |
|----------------------|----------------------------------------------------------------------------------------------------|--------------|------------------|------------------|------------------|------------------|
|                      | [NM_001033213]                                                                                     |              |                  |                  |                  |                  |
| <i>Ttll7</i>         | tubulin tyrosine ligase-like family, member 7 (Ttll7)<br>[NM_027594]                               | 198.2        | 146531589        | 146532187        | 146578616        | 146580183        |
| <i>Ttn</i>           | titin (Ttn), transcript variant N2-A [NM_011652]                                                   | 4            | 76744022         | 76744755         | 76807198         | 76808538         |
| <i>Txndc5</i>        | thioredoxin domain containing 5 (Txndc5)<br>[NM_145367]                                            | 35.5         | 38641619         | 38642258         | 38629125         | 38630624         |
| <i>Uggt1</i>         | UDP-glucose glycoprotein glucosyltransferase 1<br>(Uggt1) [NM_198899]                              | 3.7          | 36225320         | 36226045         | 36309499         | 36313520         |
| <i>Uhrf1bp1</i>      | UHRF1 (ICBP90) binding protein 1 (Uhrf1bp1)<br>[NM_001080769]                                      | 5.8          | 27987660         | 27988398         | 28011158         | 28014939         |
| <i>Umps</i>          | uridine monophosphate synthetase (Umps)<br>[NM_009471]                                             | 3.2          | 33983532         | 33984301         | 33997189         | 33999783         |
| <i>Unc13a</i>        | <b>unc-13 homolog A (<i>C. elegans</i>) (Unc13a)<br/>[NM_001029873]</b>                            | <b>2.1</b>   | <b>74168143</b>  | <b>74169168</b>  | <b>74167888</b>  | <b>74171172</b>  |
| <i>Unc5cl</i>        | unc-5 homolog C ( <i>C. elegans</i> )-like (Unc5cl)<br>[NM_152823]                                 | 58.7         | 48651810         | 48652769         | 48598587         | 48600491         |
| <i>Unc79</i>         | unc-79 homolog ( <i>C. elegans</i> ) (Unc79)<br>[NM_001081017]                                     | 2.6          | 104162021        | 104162789        | 104186398        | 104188535        |
| <i>Upb1</i>          | ureidopropionase, beta (Upb1) [NM_133995]                                                          | 28.9         | 74837900         | 74838632         | 74868760         | 74870452         |
| <i>Use1</i>          | unconventional SNARE in the ER 1 homolog ( <i>S. cerevisiae</i> ) (Use1), [NM_025917]              | 3.9          | 73871114         | 73872627         | 73877141         | 73886026         |
| <i>Usp29</i>         | ubiquitin-specific peptidase 29                                                                    | 4.5          | 6880296          | 6881101          | 6870470          | 6872648          |
| <i>Usp30</i>         | ubiquitin-specific peptidase 30                                                                    | 2.3          | 114560601        | 114563452        | 114554403        | 114558599        |
| <i>Usp42</i>         | ubiquitin-specific peptidase 42 (Usp42)<br>[NM_029749]                                             | 3.9          | 144444285        | 144445384        | 144475226        | 144479456        |
| <i>Utp14b</i>        | <b>UTP14, U3 small nucleolar ribonucleoprotein,<br/>homolog B (yeast) (Utp14b), [NM_001001981]</b> | <b>2.1</b>   | <b>78712488</b>  | <b>78713419</b>  | <b>78712558</b>  | <b>78713452</b>  |
| <i>Vat1l</i>         | <b>vesicle amine transport protein 1 homolog-like (<i>T. californica</i>) (Vat1l) [NM_173016]</b>  | <b>24.7</b>  | <b>116729100</b> | <b>116731018</b> | <b>116728608</b> | <b>116731255</b> |
| <i>Vdac3</i>         | voltage-dependent anion channel 3 (Vdac3),<br>[NM_011696]                                          | 4            | 23675708         | 23676755         | 23678215         | 23681120         |
| <i>Vldlr</i>         | very low density lipoprotein receptor (Vldlr),<br>[NM_013703]                                      | 2.8          | 27215041         | 27216127         | 27312294         | 27313639         |
| <i>Vti1a</i>         | vesicle transport through interaction with t-SNAREs<br>1A                                          | 5.8          | 55408847         | 55409876         | 55416100         | 55417693         |
| <i>Wbscr17</i>       | Williams-Beuren syndrome chromosome region 17<br>homolog (human) (Wbscr17) [NM_145218]             | 4.7          | 131871425        | 131872703        | 131780787        | 131784325        |
| <i>Wfdc3</i>         | WAP four-disulfide core domain 3 (Wfdc3)<br>[NM_027961]                                            | 2.5          | 164567002        | 164567866        | 164558960        | 164561160        |
| <i>Wisp2</i>         | WNT1 inducible signaling pathway protein 2 (Wisp2)<br>[NM_016873]                                  | 18.4         | 163612515        | 163613513        | 163647668        | 163651653        |
| <i>Wnt5a</i>         | wingless-related MMTV integration site 5A (Wnt5a),<br>[NM_009524]                                  | 4.9          | 29264113         | 29264727         | 29255334         | 29256884         |
| <i>Xpo7</i>          | exportin 7 (Xpo7) [NM_023045]                                                                      | 88           | 71197033         | 71198684         | 71173775         | 71178601         |
| <i>Xrcc6bp1</i>      | XRCC6-binding protein 1 (Xrcc6bp1),<br>[NM_001159559]                                              | 4.3          | 126335254        | 126336170        | 126326079        | 126328066        |
| <i>Zbp1</i>          | <b>Z-DNA-binding protein 1 (Zbp1), [NM_021394]</b>                                                 | <b>118.6</b> | <b>173041305</b> | <b>173043285</b> | <b>173041109</b> | <b>173045625</b> |
| <i>Zeb2</i>          | zinc finger E-box-binding homeobox 2 (Zeb2),<br>[NM_015753]                                        | 204.2        | 45053779         | 45054366         | 44970656         | 44973294         |
| <i>Zfp2</i>          | zinc finger protein 2 (Zfp2), [NM_001044697]                                                       | 13.6         | 50723506         | 50724487         | 50719465         | 50720284         |
| <i>Zfp238</i>        | zinc finger protein 238 (Zfp238), [NM_013915]                                                      | 3.6          | 179392853        | 179394131        | 179386281        | 179387524        |
| <i>Zfp369</i>        | <b>zinc finger protein 369 (Zfp369) [NM_178364]</b>                                                | <b>3.5</b>   | <b>65411046</b>  | <b>65411799</b>  | <b>65410953</b>  | <b>65412030</b>  |
| <i>Zfp383</i>        | zinc finger protein 383 (Zfp383) [NM_001243908]                                                    | 2.4          | 30660328         | 30661118         | 30648892         | 30651109         |
| <i>Zfp518b</i>       | zinc finger protein 518B (Zfp518b),<br>[NM_001081144]                                              | 10.8         | 39060488         | 39060964         | 39064339         | 39066045         |
| <i>Zfp521</i>        | zinc finger protein 521 (Zfp521) [NM_145492]                                                       | 10.7         | 14075720         | 14076433         | 14127886         | 14130415         |
| <i>Zfp607</i>        | zinc finger protein 607 (Zfp607) [NM_001024726]                                                    | 4            | 28661198         | 28661989         | 28655938         | 28657550         |
| <i>Zfp92</i>         | <b>zinc finger protein 92 (Zfp92) [NM_009566]</b>                                                  | <b>2.6</b>   | <b>70666932</b>  | <b>70668380</b>  | <b>70666768</b>  | <b>70668613</b>  |
| <i>Zfr</i>           | zinc finger RNA-binding protein (Zfr) [NM_011767]                                                  | 5.3          | 12065977         | 12066576         | 12004279         | 12005874         |
| <i>0610011L14Rik</i> | RIKEN cDNA 0610011L14 gene (0610011L14Rik),<br>[NM_026661]                                         | 28.5         | 156383285        | 156384943        | 156366470        | 156369464        |
| <i>0610040J01Rik</i> | RIKEN cDNA 0610040J01 gene (0610040J01Rik)<br>[NM_029554]                                          | 508          | 64159275         | 64160226         | 64202895         | 64204576         |
| <i>1110004F10Rik</i> | RIKEN cDNA 1110004F10 gene (1110004F10Rik)<br>[NM_019772]                                          | 172.2        | 123290936        | 123292664        | 123262748        | 123264502        |
| <i>1110032A03Rik</i> | RIKEN cDNA 1110032A03 gene                                                                         | 6.8          | 50600617         | 50601198         | 50610935         | 50612362         |
| <i>1110038F14Rik</i> | <b>RIKEN cDNA 1110038F14 gene (1110038F14Rik)<br/>[NM_054099]</b>                                  | <b>2.1</b>   | <b>76765559</b>  | <b>76766318</b>  | <b>76762933</b>  | <b>76766429</b>  |
| <i>1300010F03Rik</i> | RIKEN cDNA 1300010F03 gene (1300010F03Rik),<br>[NM_173758]                                         | 8.9          | 79324915         | 79325579         | 79432547         | 79433615         |
| <i>1700001L19Rik</i> | RIKEN cDNA 1700001L19 gene (1700001L19Rik)<br>[NM_027035]                                          | 99.6         | 68753198         | 68753801         | 68751127         | 68752127         |
| <i>1700008A04Rik</i> | RIKEN cDNA 1700008A04 gene (1700008A04Rik)<br>[NM_027050]                                          | 2.4          | 32710972         | 32711814         | 32732218         | 32733874         |
| <i>1700011L22Rik</i> | RIKEN cDNA 1700011L22 gene (1700011L22Rik)<br>[NM_026315]                                          | 3            | 81739495         | 81739976         | 81711757         | 81714862         |
| <i>1700056E22Rik</i> | RIKEN cDNA 1700056E22 gene (1700056E22Rik)                                                         | 3.2          | 185926501        | 185926968        | 186017045        | 186018960        |

|                      |                                                                            |       |           |           |           |           |
|----------------------|----------------------------------------------------------------------------|-------|-----------|-----------|-----------|-----------|
| <i>2310046A06Rik</i> | [NM_028516]<br>RIKEN cDNA 2310046A06 gene (2310046A06Rik)<br>[NM_027150]   | 137.1 | 77204923  | 77205753  | 77232795  | 77234161  |
| <i>2410076I21Rik</i> | RIKEN cDNA 2410076I21 gene (2410076I21Rik)<br>[NM_028598]                  | 14.4  | 58600384  | 58601025  | 58600080  | 58601330  |
| <i>2700060E02Rik</i> | RIKEN cDNA 2700060E02 gene (2700060E02Rik)<br>[NM_026528]                  | 3.2   | 20709016  | 20709954  | 20615795  | 20617035  |
| <i>4930403N07Rik</i> | RIKEN cDNA 4930403N07 gene (4930403N07Rik)<br>[NM_028687]                  | 2.8   | 73261933  | 73262571  | 73298819  | 73299961  |
| <i>6720456H20Rik</i> | RIKEN cDNA 6720456H20 gene (6720456H20Rik)<br>[NM_172600]                  | 22.2  | 49157918  | 49158600  | 49047830  | 49049540  |
| <i>9530059O14Rik</i> | RIKEN cDNA 9530059O14 gene                                                 | 2.1   | 122490155 | 122490785 | 122477125 | 122482835 |
| <i>9930013L23Rik</i> | RIKEN cDNA 9930013L23 gene (9930013L23Rik)<br>[NM_030728]                  | 2.5   | 91247980  | 91248809  | 91233194  | 91237271  |
| <i>A530098C11Rik</i> | RIKEN cDNA A530098C11 gene (A530098C11Rik)<br>[NM_001013799]               | 13.4  | 44091624  | 44092993  | 44091544  | 44092592  |
| <i>A730011L01Rik</i> | RIKEN cDNA A730011L01 gene (A730011L01Rik),<br>[NM_177394]                 | 4.5   | 119340744 | 119341974 | 119322649 | 119324480 |
| <i>A830080D01Rik</i> | RIKEN cDNA A830080D01 gene (A830080D01Rik)<br>[NM_001033472]               | 2.5   | 155946220 | 155946946 | 155964071 | 155966209 |
| <i>A930033H14Rik</i> | RIKEN cDNA A930033H14 gene (A930033H14Rik),<br>partial miscRNA [XR_105403] | 2.2   | 68711154  | 68711952  | 68698878  | 68700651  |

Genes up-regulated in Cbx4KO cells and showing Cbx4 and H3K27me3 binding. Directly overlapping Cbx4 and H3K27me3 ChIP-seq peaks are shown in red.
